# Supplementary material for: Increased Vocalization of Rats in Response to Ultrasonic Playback as a Sign of Hypervigilance Following Fear Conditioning
Source: MDPI journal article supplement (doi:10.3390/brainsci11080970), 2021-07-23
Supplement: s1 [file s1]

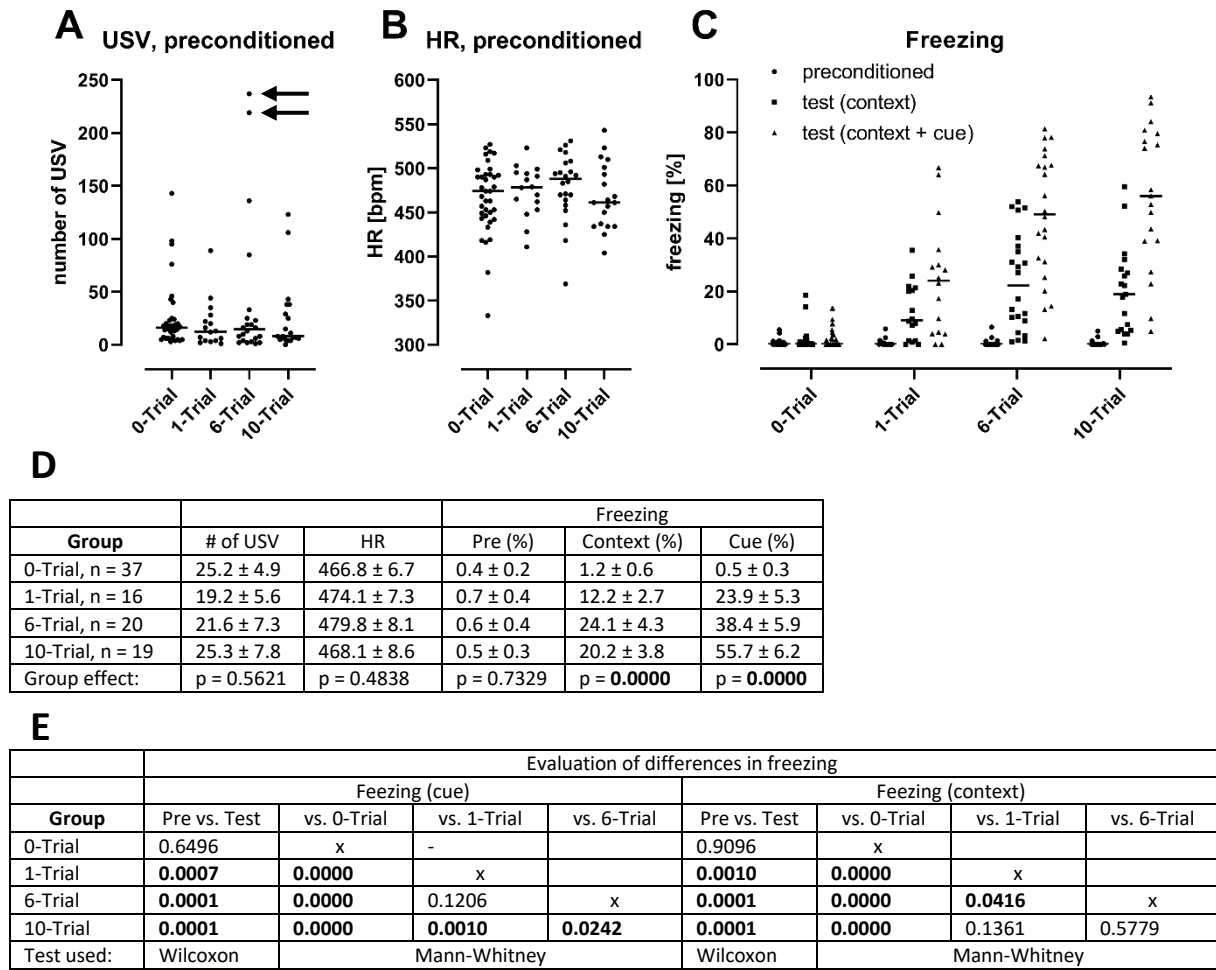

**Figure S1.** Graph of emitted USV (**A**), heart rate (HR) (**B**) and freezing levels (**C**) of rats before conditioning (**A**, **B**, dots in **C**; with medians); and test freezing levels to context (5 min, squares) and context with cue (light; averaged three 20-s long exposures, triangles). Arrows in **A** show two copiously vocalizing rats which were not included in the final analysis. (**D**) Table of the values graphed and group effects (Kruskal-Willis). (**E**) Table of statistical comparisons of freezing between preconditional (pre) values and test values (Wilcoxon) as well as test values between groups (Mann-Whitney), with  $p < 0.05$  values in bold.

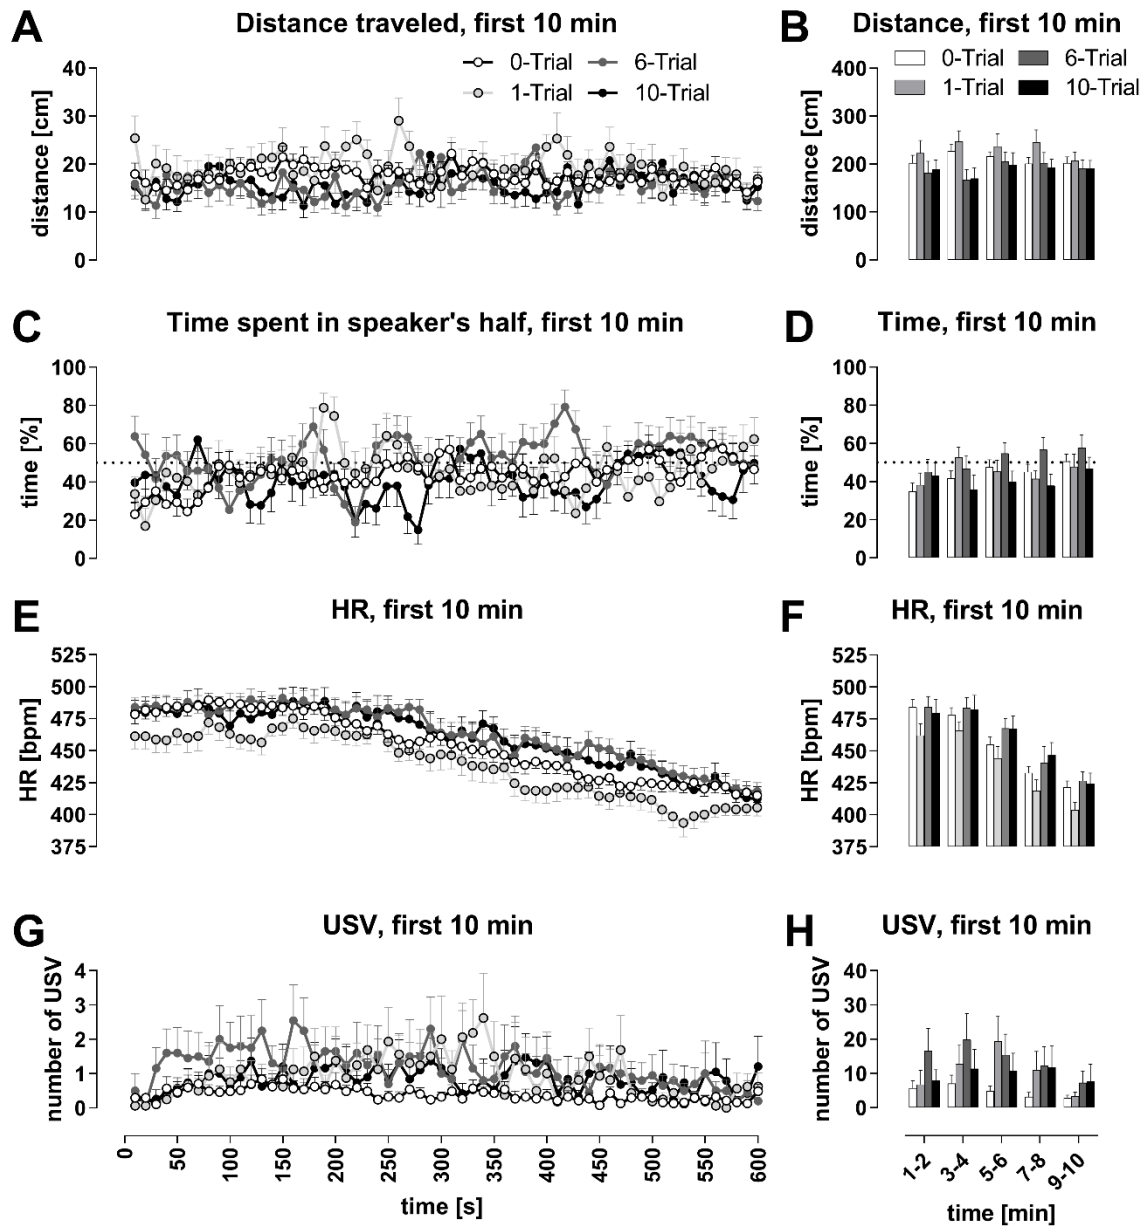

**Figure S2.** Assessment of locomotor activity, heart rate (HR) and the number of USV emitted of all animals during the first 10 min of silence in the experimental cage; (**A, B**) distance traveled (cm); (**C, D**) time (%) spent in a speaker's half of the cage with horizontal dotted line marking 50% chance level; results above it show more time in the speaker's half; (**E, F**) heart rate (bpm); (**G, H**) number of USV. Values are means with SEM. HR, initially stable, declined progressively in all four groups; however, HR in 1-Trial group was lower than in groups with zero, six and ten shocks. Mean values with SEM are presented for 10-s intervals in line graphs (**A, C, E, G**) and 2-min intervals in bar graphs (**B, D, F, H**); groups: 0-Trial,  $n = 37$ ; 1-Trial,  $n = 16$ ; 6-Trial,  $n = 20$ ; 10-Trial,  $n = 19$ .

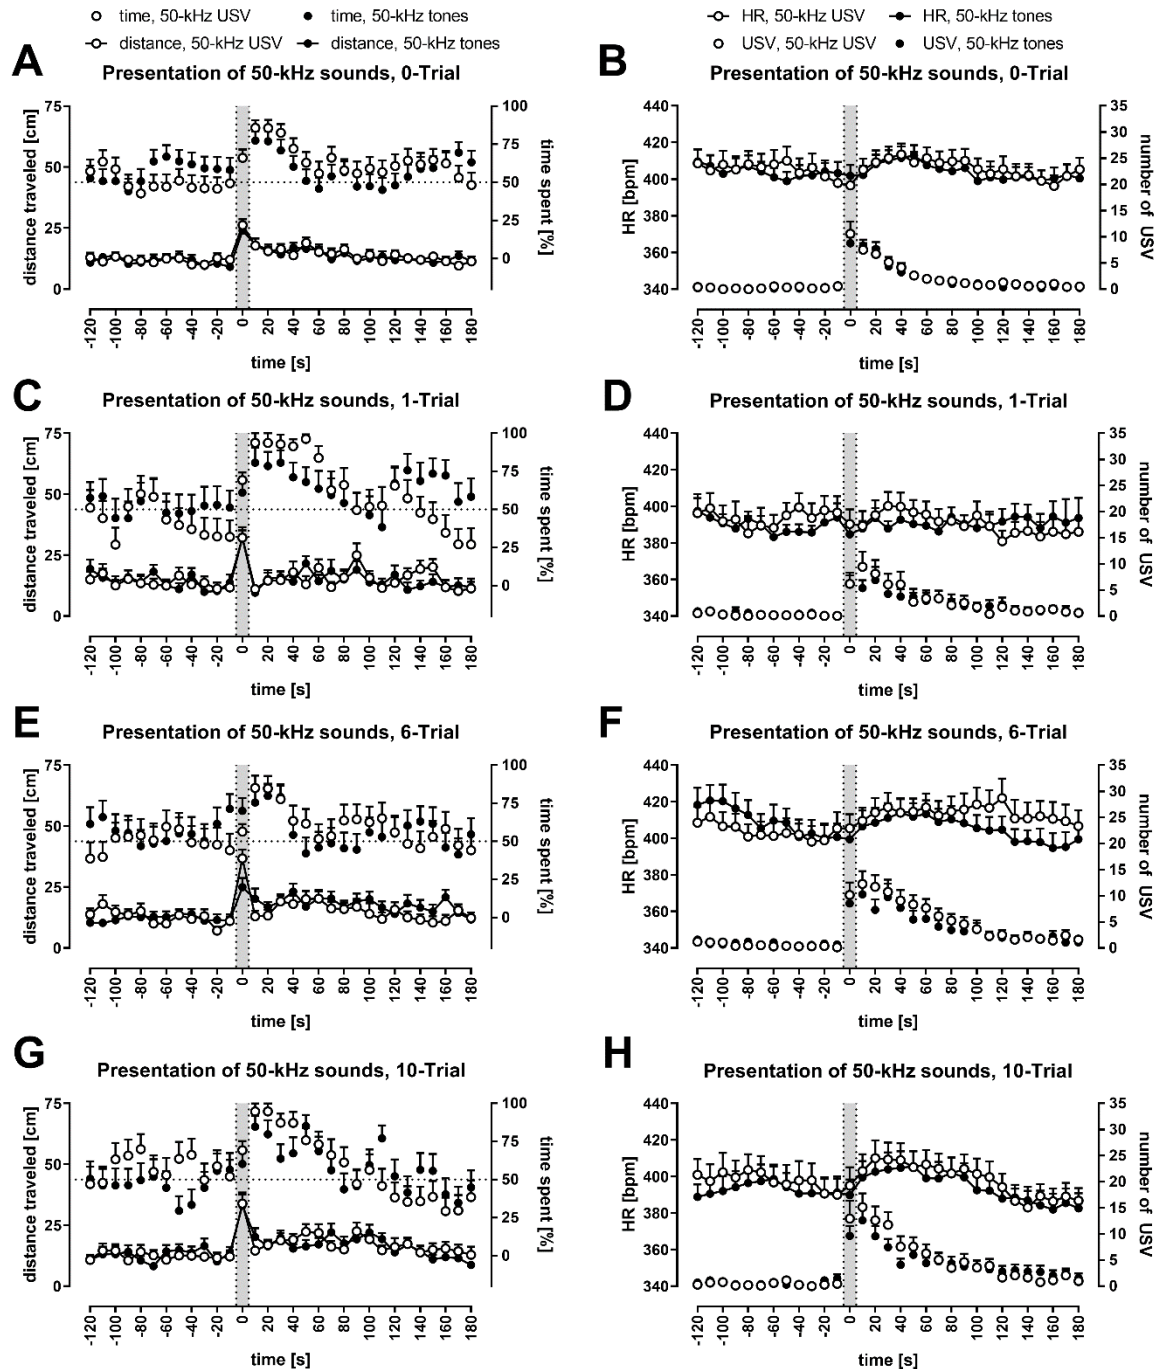

**Figure S3.** Effect of 50-kHz ultrasonic playback sounds on distance traveled, time spent in the speaker's half of the cage, heart rate (HR) and USV emission. Gray sections correspond to the 10-s-long ultrasonic presentation. Graphs depict responses after previous exposure to: no shock (A, B), one shock (C, D), six shocks (E, F), and ten shocks (G, H). In the left column (A, C, E, G), distance traveled is presented as connected dots (cm, left Y axis), percentage of time spent in the speaker's cage half – as not connected dots (% , right Y axis). In the right column (B, D, F, H), HR is presented as connected dots (bpm; beats per minute, left Y axis); the number of USV is presented as not connected dots (right Y axis). Each point is a mean for a 10-s-long time-interval with SEM. The dotted horizontal line marks a 50% chance value for time in a side of the cage. HR increased after playback in all groups except 1-Trial rats. There was also a clear USV response to the playback in all groups. The increase in locomotor activity to the playback was more pronounced in fear-conditioned (FC) animals than in 0-Trial rats; groups: 0-Trial, n = 37; 1-Trial, n = 16; 6-Trial, n = 20; 10-Trial, n = 19.

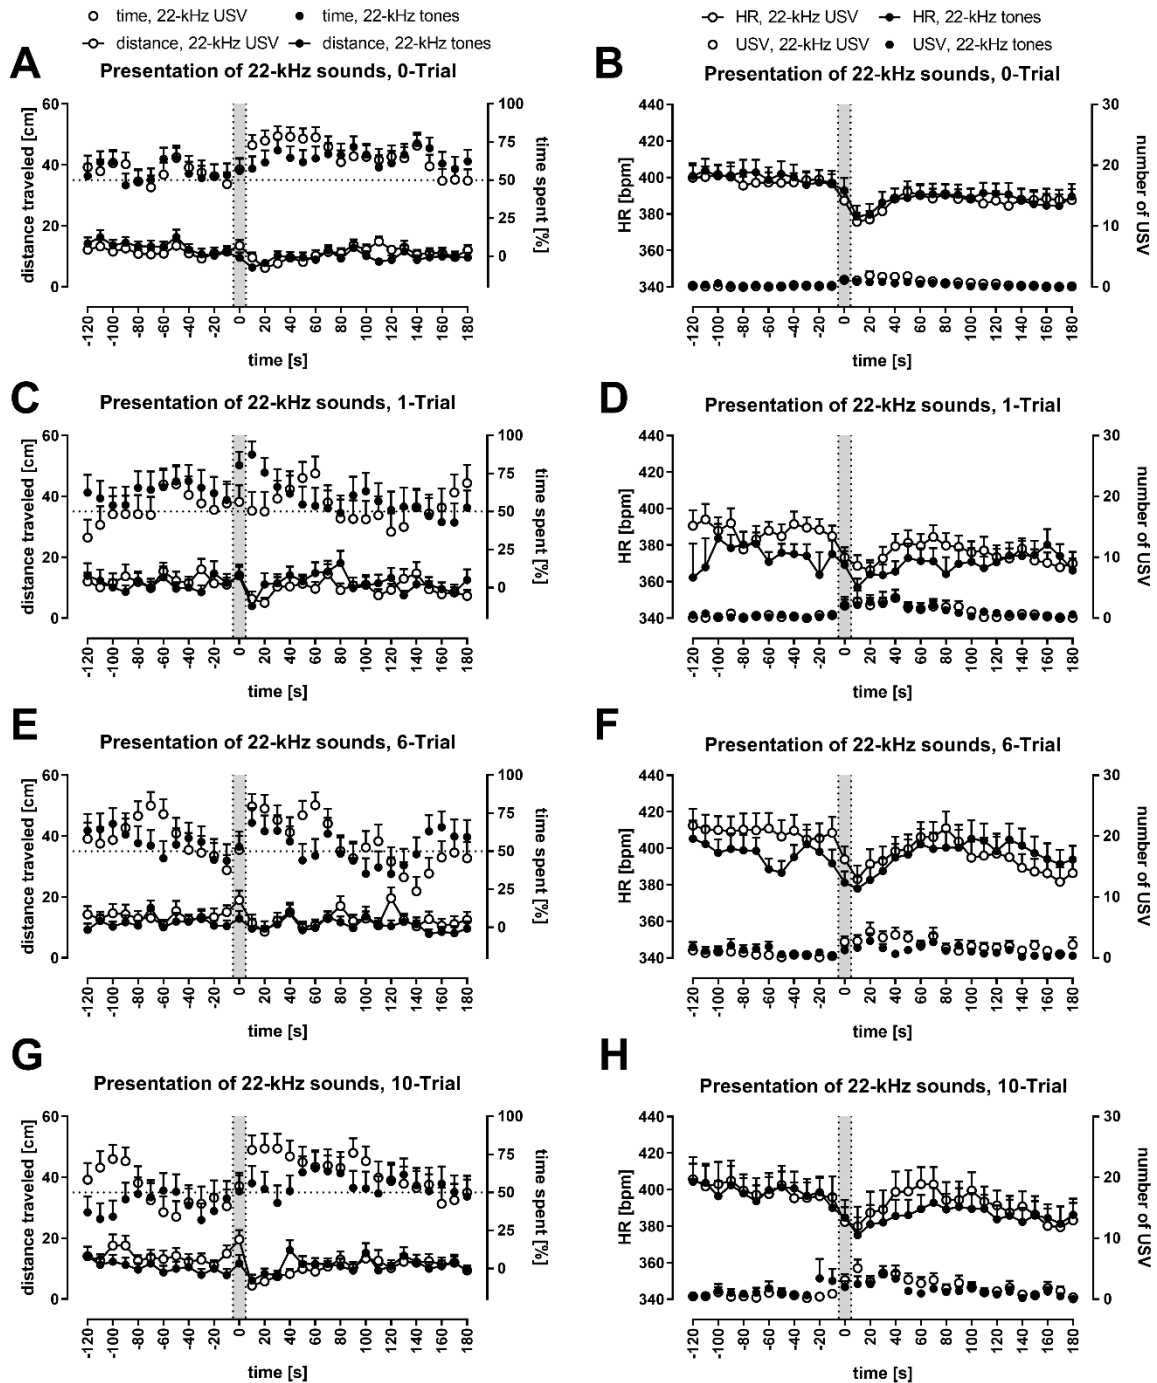

**Figure S4.** Effect of 22-kHz ultrasonic playback sounds on distance traveled, time spent in the speaker's half of the cage, heart rate (HR) and USV emission. Gray sections correspond to the 10-s-long ultrasonic presentation. Graphs depict responses after previous exposure to: no shock (A, B), one shock (C, D), six shocks (E, F), and ten shocks (G, H). In the left column (A, C, E, G), distance traveled is presented as connected dots (cm, left Y axis), percentage of time spent in the speaker's cage half – as not connected dots (% , right Y axis). In the right column (B, D, F, H), HR is presented as connected dots (bpm; beats per minute, left Y axis); the number of USV is presented as not connected dots (right Y axis). Each point is a mean for a 10-s-long time-interval with SEM. The dotted horizontal line marks a 50% chance value for time in a side of the cage. Playback exposure results in an HR drop in all four groups. There was also a clear USV response to the playback, especially in FC groups. The decrease in locomotor activity after the playback was more pronounced in FC animals than in 0-Trial rats; groups: 0-Trial,  $n = 37$ ; 1-Trial,  $n = 16$ ; 6-Trial,  $n = 20$ ; 10-Trial,  $n = 19$ .

| time-interval [s] / group | 0-Trial              | 1-Trial       | 6-Trial       | 10-Trial      | all rats      | 0-Trial              | 1-Trial       | 6-Trial       | 10-Trial      | all rats      |
|---------------------------|----------------------|---------------|---------------|---------------|---------------|----------------------|---------------|---------------|---------------|---------------|
| # of rats                 | n = 37               | n = 16        | n = 20        | n = 19        | n = 92        | n = 37               | n = 16        | n = 20        | n = 19        | n = 92        |
| <b>distance</b>           |                      |               |               |               |               |                      |               |               |               |               |
|                           | <b>50-kHz USV</b>    |               |               |               |               | <b>22-kHz USV</b>    |               |               |               |               |
| -120 to 180               | <b>0.0000</b>        | <b>0.0049</b> | <b>0.0000</b> | <b>0.0001</b> | <b>0.0000</b> | <b>0.0012</b>        | <b>0.0073</b> | 0.5023        | <b>0.0018</b> | <b>0.0000</b> |
| -60 to 60                 | <b>0.0000</b>        | <b>0.0035</b> | <b>0.0000</b> | <b>0.0001</b> | <b>0.0000</b> | <b>0.0001</b>        | <b>0.0010</b> | 0.1131        | <b>0.0002</b> | <b>0.0000</b> |
| -10 to 10                 | <b>0.0000</b>        | <b>0.0001</b> | <b>0.0001</b> | <b>0.0007</b> | <b>0.0000</b> | 0.1635               | <b>0.0152</b> | <b>0.0150</b> | <b>0.0004</b> | <b>0.0000</b> |
| 0 to 30                   | <b>0.0009</b>        | <b>0.0000</b> | <b>0.0000</b> | <b>0.0134</b> | <b>0.0000</b> | <b>0.0001</b>        | <b>0.0005</b> | <b>0.0037</b> | <b>0.0002</b> | <b>0.0000</b> |
| -120 to -100              | 0.3485               | 0.4724        | 0.7047        | 0.1426        | 0.7457        | 0.9733               | 0.7788        | 0.1572        | 0.6918        | 0.5153        |
| -30 to -10                | 0.0855               | 0.6454        | 0.0907        | 0.2683        | <b>0.0461</b> | 0.1923               | 0.7788        | 0.3499        | 0.8539        | 0.6545        |
|                           | <b>50-kHz tone</b>   |               |               |               |               | <b>22-kHz tone</b>   |               |               |               |               |
| -120 to 180               | <b>0.0000</b>        | <b>0.0019</b> | <b>0.0001</b> | <b>0.0000</b> | <b>0.0000</b> | <b>0.0000</b>        | 0.1346        | 0.2252        | <b>0.0943</b> | <b>0.0000</b> |
| -60 to 60                 | <b>0.0000</b>        | <b>0.0012</b> | <b>0.0028</b> | <b>0.0007</b> | <b>0.0000</b> | <b>0.0004</b>        | <b>0.0130</b> | 0.1252        | <b>0.0397</b> | <b>0.0000</b> |
| -10 to 10                 | <b>0.0000</b>        | <b>0.0016</b> | <b>0.0260</b> | <b>0.0029</b> | <b>0.0000</b> | <b>0.0306</b>        | <b>0.0053</b> | 0.0863        | <b>0.0120</b> | <b>0.0000</b> |
| 0 to 30                   | <b>0.0172</b>        | <b>0.0005</b> | 0.0905        | 0.1657        | <b>0.0000</b> | 0.0846               | <b>0.0023</b> | <b>0.0043</b> | <b>0.0207</b> | <b>0.0000</b> |
| -120 to -100              | 0.4820               | 0.1738        | 0.7047        | 0.6227        | 0.8404        | 0.7841               | 0.4437        | 0.5220        | 0.6918        | 0.7959        |
| -30 to -10                | 0.9221               | 0.6456        | 1.0000        | 0.4308        | 0.9575        | 0.6489               | 0.4724        | 0.3867        | 0.6918        | 0.9892        |
|                           | <b>50-kHz sounds</b> |               |               |               |               | <b>22-kHz sounds</b> |               |               |               |               |
| -120 to 180               | <b>0.0000</b>        | <b>0.0002</b> | <b>0.0000</b> | <b>0.0000</b> | <b>0.0000</b> | <b>0.0000</b>        | <b>0.0014</b> | 0.0676        | <b>0.0025</b> | <b>0.0000</b> |
| -60 to 60                 | <b>0.0000</b>        | <b>0.0000</b> | <b>0.0000</b> | <b>0.0000</b> | <b>0.0000</b> | <b>0.0000</b>        | <b>0.0004</b> | <b>0.0261</b> | <b>0.0014</b> | <b>0.0000</b> |
| -10 to 10                 | <b>0.0000</b>        | <b>0.0002</b> | <b>0.0001</b> | <b>0.0002</b> | <b>0.0000</b> | <b>0.0306</b>        | <b>0.0072</b> | 0.0743        | <b>0.0009</b> | <b>0.0000</b> |
| 0 to 30                   | <b>0.0005</b>        | <b>0.0000</b> | <b>0.0000</b> | <b>0.0010</b> | <b>0.0000</b> | <b>0.0017</b>        | <b>0.0027</b> | <b>0.0072</b> | <b>0.0004</b> | <b>0.0000</b> |
| -120 to -100              | 0.4692               | 0.2691        | 0.5220        | 0.6918        | 0.8682        | 0.8276               | 0.6456        | 0.7047        | 0.5318        | 0.9267        |
| -30 to -10                | 0.8276               | 0.4437        | 0.3867        | 0.2683        | 0.4237        | <b>0.0275</b>        | 0.5698        | 0.5488        | 0.9487        | 0.2023        |

**Table S1.** Evaluation of changes in **distance traveled** around playback of ultrasounds (50-kHz USV, 50-kHz tones, 22-kHz USV, 22-kHz tones; with averaged results for USV and tones, i.e. sounds) presented during the 0 s time-interval (from -120 s to 180 s, -60 s to 60 s, -10 s to 10 s), as well as during the control intervals before playback (from -120 s to -100 s, -30 s to -10 s) observed in control rats (0-Trial), and rats which underwent fear-conditioning with different number of shocks (1-Trial, 6-Trial, 10-Trial) as well as all the rats analyzed together, all Friedman test, with  $p < 0.05$  values in bold. Please note  $p > 0.05$  values for -120 to -100 s and -30 to -10 s intervals.

| group:                                | 0-Trial              | 1-Trial       | 6-Trial       | 10-Trial      | all rats      | 0-Trial              | 1-Trial       | 6-Trial       | 10-Trial      | all rats      |
|---------------------------------------|----------------------|---------------|---------------|---------------|---------------|----------------------|---------------|---------------|---------------|---------------|
| # of rats                             | n = 37               | n = 16        | n = 20        | n = 19        | n = 92        | n = 37               | n = 16        | n = 20        | n = 19        | n = 92        |
| <b>time in speaker's half vs. 50%</b> |                      |               |               |               |               |                      |               |               |               |               |
| time-interval [s]                     | <b>50-kHz USV</b>    |               |               |               |               | <b>22-kHz USV</b>    |               |               |               |               |
| 0 s (playback)                        | <b>0.0089</b>        | <b>0.0013</b> | 0.1259        | <b>0.0079</b> | <b>0.0000</b> | 0.3694               | 0.6051        | 0.9851        | 0.6580        | 0.1173        |
| 10 s to 30 s                          | <b>0.0000</b>        | <b>0.0023</b> | <b>0.0117</b> | <b>0.0002</b> | <b>0.0000</b> | <b>0.0009</b>        | 0.6233        | <b>0.0090</b> | <b>0.0401</b> | <b>0.0000</b> |
| 10 s to 60 s                          | <b>0.0001</b>        | <b>0.0005</b> | <b>0.0333</b> | <b>0.0001</b> | <b>0.0000</b> | <b>0.0000</b>        | 0.2775        | <b>0.0100</b> | 0.0586        | <b>0.0000</b> |
| -120 s to -100 s                      | 0.2516               | 0.5695        | 0.4781        | 0.8405        | 0.7807        | 0.8268               | 0.5180        | 0.3507        | 0.1119        | 0.1279        |
| -30 s to -10 s                        | 0.7400               | 0.0980        | 0.7938        | 0.7172        | 0.3831        | 0.3694               | 0.7564        | 0.6274        | 0.7475        | 0.9101        |
|                                       | <b>50-kHz tone</b>   |               |               |               |               | <b>22-kHz tone</b>   |               |               |               |               |
| 0 s (playback)                        | <b>0.0115</b>        | 0.2343        | <b>0.0383</b> | 0.2954        | <b>0.0001</b> | 0.4644               | <b>0.0174</b> | 0.7369        | 0.8092        | <b>0.0310</b> |
| 10 s to 30 s                          | <b>0.0003</b>        | <b>0.0038</b> | <b>0.0012</b> | <b>0.0048</b> | <b>0.0000</b> | 0.0738               | <b>0.0299</b> | 0.1672        | 0.8721        | <b>0.0058</b> |
| 10 s to 60 s                          | <b>0.0123</b>        | <b>0.0061</b> | <b>0.0366</b> | <b>0.0017</b> | <b>0.0000</b> | <b>0.0499</b>        | 0.0557        | 0.2180        | 0.6292        | <b>0.0056</b> |
| -120 s to -100 s                      | 0.9339               | 0.9588        | 0.3317        | 0.8092        | 0.7377        | 0.2078               | 0.4080        | 0.1730        | 0.0910        | 0.2949        |
| -30 s to -10 s                        | 0.2454               | 1.0000        | 0.2043        | 0.7782        | 0.1379        | 0.8504               | 0.2553        | 0.9702        | 0.3981        | 0.8993        |
|                                       | <b>50-kHz sounds</b> |               |               |               |               | <b>22-kHz sounds</b> |               |               |               |               |
| 0 s (playback)                        | <b>0.0004</b>        | <b>0.0125</b> | <b>0.0249</b> | <b>0.0279</b> | <b>0.0000</b> | 0.3219               | <b>0.0294</b> | 0.8753        | 0.7564        | 0.0531        |
| 10 s to 30 s                          | <b>0.0000</b>        | <b>0.0007</b> | <b>0.0017</b> | <b>0.0003</b> | <b>0.0000</b> | <b>0.0003</b>        | 0.0830        | <b>0.0072</b> | 0.1005        | <b>0.0000</b> |
| 10 s to 60 s                          | <b>0.0002</b>        | <b>0.0004</b> | <b>0.0206</b> | <b>0.0002</b> | <b>0.0000</b> | <b>0.0003</b>        | <b>0.0438</b> | <b>0.0075</b> | 0.0840        | <b>0.0000</b> |
| -120 s to -100 s                      | 0.3037               | 0.4899        | 0.6580        | 0.8261        | 0.4755        | 0.1102               | 0.9750        | 0.1788        | 0.7983        | 0.0810        |
| -30 s to -10 s                        | 0.4331               | 0.3343        | 0.6701        | 0.6192        | 0.6486        | 0.7613               | 0.3627        | 0.6603        | 0.4229        | 0.9534        |

**Table S2.** Evaluation **time spent** in the speaker's half values in **comparison with 50% chance level** during playback of ultrasounds, i.e. 50-kHz USV, 50-kHz tones, 22-kHz USV, 22-kHz tones, averaged USV and tones (sounds), i.e. during the 0 s time-interval, and immediately after (from 10 s to 30 s, 10 s to 60 s) as well as during the control intervals before playback (from -120 s to -100 s, -30 s to -10 s) observed in control rats (0-Trial), and rats which underwent fear-conditioning with different number of shocks (1-Trial, 6-Trial, 10-Trial) as well as all the rats analyzed together, all Wilcoxon test, with  $p < 0.05$  values in bold. Please note  $p > 0.05$  values for all -120 to -100 s and -30 to -10 s intervals.

| time-interval [s] / group | 0-Trial              | 1-Trial       | 6-Trial       | 10-Trial      | all rats      | 0-Trial              | 1-Trial       | 6-Trial       | 10-Trial      | all rats      |
|---------------------------|----------------------|---------------|---------------|---------------|---------------|----------------------|---------------|---------------|---------------|---------------|
| # of rats                 | n = 37               | n = 16        | n = 20        | n = 19        | n = 92        | n = 37               | n = 16        | n = 20        | n = 19        | n = 92        |
| <b>time</b>               |                      |               |               |               |               |                      |               |               |               |               |
|                           | <b>50-kHz USV</b>    |               |               |               |               | <b>22-kHz USV</b>    |               |               |               |               |
| -120 to 180               | <b>0.0000</b>        | <b>0.0000</b> | <b>0.0384</b> | <b>0.0000</b> | <b>0.0000</b> | <b>0.0000</b>        | 0.0790        | <b>0.0000</b> | <b>0.0000</b> | <b>0.0000</b> |
| -60 to 60                 | <b>0.0000</b>        | <b>0.0000</b> | <b>0.0034</b> | <b>0.0004</b> | <b>0.0000</b> | <b>0.0000</b>        | 0.1591        | <b>0.0002</b> | <b>0.0000</b> | <b>0.0000</b> |
| -10 to 10                 | <b>0.0001</b>        | <b>0.0001</b> | <b>0.0070</b> | <b>0.0007</b> | <b>0.0000</b> | <b>0.0012</b>        | 0.9623        | <b>0.0023</b> | <b>0.0000</b> | <b>0.0000</b> |
| 0 to 30                   | <b>0.0003</b>        | <b>0.0001</b> | <b>0.0000</b> | <b>0.0012</b> | <b>0.0000</b> | <b>0.0017</b>        | 0.6957        | <b>0.0035</b> | <b>0.0033</b> | <b>0.0000</b> |
| -120 to -100              | 0.5163               | <b>0.0162</b> | 0.2725        | 0.1629        | 0.8995        | 0.9520               | 0.1677        | 0.9608        | 0.0839        | 0.2259        |
| -30 to -10                | 0.7903               | 0.8777        | 0.8700        | 0.6483        | 0.9931        | 0.1499               | 0.8465        | 0.3932        | 0.8777        | 0.2111        |
|                           | <b>50-kHz tone</b>   |               |               |               |               | <b>22-kHz tone</b>   |               |               |               |               |
| -120 to 180               | <b>0.0021</b>        | 0.0930        | 0.0948        | <b>0.0016</b> | <b>0.0000</b> | 0.0719               | <b>0.0492</b> | 0.1855        | 0.3230        | 0.1396        |
| -60 to 60                 | <b>0.0055</b>        | 0.0800        | 0.0628        | <b>0.0001</b> | <b>0.0000</b> | 0.0882               | 0.3111        | 0.3943        | 0.2053        | <b>0.0028</b> |
| -10 to 10                 | 0.1283               | <b>0.0458</b> | 0.4493        | <b>0.0138</b> | <b>0.0000</b> | 0.2927               | <b>0.0098</b> | 0.0762        | 0.3093        | <b>0.0007</b> |
| 0 to 30                   | <b>0.0407</b>        | <b>0.0112</b> | 0.6933        | <b>0.0092</b> | <b>0.0000</b> | <b>0.0325</b>        | 0.1061        | 0.0803        | 0.7074        | <b>0.0250</b> |
| -120 to -100              | 0.9810               | 0.6065        | 0.5890        | 0.9556        | 0.7463        | 0.7309               | 0.6188        | 0.5258        | 0.9661        | 0.8310        |
| -30 to -10                | 0.9355               | 0.9592        | 0.0949        | 0.8574        | 0.6065        | 0.9200               | 0.8984        | 0.1188        | <b>0.0366</b> | 0.4939        |
|                           | <b>50-kHz sounds</b> |               |               |               |               | <b>22-kHz sounds</b> |               |               |               |               |
| -120 to 180               | <b>0.0000</b>        | <b>0.0000</b> | <b>0.0193</b> | <b>0.0000</b> | <b>0.0000</b> | <b>0.0000</b>        | <b>0.0072</b> | <b>0.0000</b> | <b>0.0074</b> | <b>0.0000</b> |
| -60 to 60                 | <b>0.0000</b>        | <b>0.0000</b> | <b>0.0012</b> | <b>0.0000</b> | <b>0.0000</b> | <b>0.0000</b>        | 0.7520        | <b>0.0008</b> | <b>0.0041</b> | <b>0.0000</b> |
| -10 to 10                 | <b>0.0004</b>        | <b>0.0005</b> | <b>0.0093</b> | <b>0.0008</b> | <b>0.0000</b> | <b>0.0005</b>        | 0.1869        | <b>0.0002</b> | <b>0.0025</b> | <b>0.0000</b> |
| 0 to 30                   | <b>0.0008</b>        | <b>0.0011</b> | <b>0.0037</b> | <b>0.0008</b> | <b>0.0000</b> | <b>0.0006</b>        | 0.9224        | <b>0.0006</b> | <b>0.0047</b> | <b>0.0000</b> |
| -120 to -100              | 0.6286               | 0.0522        | 0.5097        | 0.6361        | 0.6023        | 0.4766               | 0.8975        | 0.8357        | 0.5669        | 0.4390        |
| -30 to -10                | 0.7221               | 0.7463        | <b>0.0414</b> | 0.4700        | 0.1639        | 0.2775               | 0.4124        | 0.1637        | 0.1870        | 0.2750        |

**Table S3.** Evaluation of changes in **time spent** in the speaker's half **around playback of ultrasounds** (50-kHz USV, 50-kHz tones, 22-kHz USV, 22-kHz tones; with averaged results for USV and tones, i.e. sounds) presented during the 0 s time-interval (from -120 s to 180 s, -60 s to 60 s, -10 s to 10 s), as well as during the control intervals before playback (from -120 s to -100 s, -30 s to -10 s) observed in control rats (0-Trial), and rats which underwent fear-conditioning with different number of shocks (1-Trial, 6-Trial, 10-Trial) as well as all the rats analyzed together, all Friedman test, with  $p < 0.05$  values in bold. Please note  $p > 0.05$  values for -120 to -100 s and -30 to -10 s intervals.

| group:                        | 0-Trial              | 1-Trial       | 6-Trial       | 10-Trial      | all rats      | 0-Trial              | 1-Trial | 6-Trial       | 10-Trial      | all rats      |
|-------------------------------|----------------------|---------------|---------------|---------------|---------------|----------------------|---------|---------------|---------------|---------------|
| n                             | n = 37               | n = 16        | n = 20        | n = 19        | n = 92        | n = 37               | n = 16  | n = 20        | n = 19        | n = 92        |
| <b>time in speaker's half</b> |                      |               |               |               |               |                      |         |               |               |               |
| time-interval [s]             | <b>50-kHz USV</b>    |               |               |               |               | <b>22-kHz USV</b>    |         |               |               |               |
| before vs. playback           | <b>0.0148</b>        | <b>0.0031</b> | 0.3760        | <b>0.0356</b> | <b>0.0000</b> | 0.2122               | 0.4413  | 0.6002        | 0.1520        | 0.0623        |
| before vs. after              | <b>0.0000</b>        | <b>0.0059</b> | 0.0557        | <b>0.0027</b> | <b>0.0000</b> | <b>0.0058</b>        | 0.9594  | <b>0.0171</b> | <b>0.0121</b> | <b>0.0000</b> |
| playback vs. after            | <b>0.0046</b>        | <b>0.0342</b> | <b>0.0065</b> | <b>0.0125</b> | <b>0.0000</b> | <b>0.0250</b>        | 0.7353  | <b>0.0186</b> | <b>0.0051</b> | <b>0.0003</b> |
|                               | <b>50-kHz tone</b>   |               |               |               |               | <b>22-kHz tone</b>   |         |               |               |               |
| before vs. playback           | 0.2414               | 0.4631        | 0.1579        | 0.3003        | <b>0.0356</b> | 0.5098               | 0.0663  | 0.6784        | 0.0929        | <b>0.0239</b> |
| before vs. after              | 0.0938               | <b>0.0277</b> | 0.1627        | 0.1089        | <b>0.0009</b> | 0.0534               | 0.1386  | 0.1361        | 0.2604        | <b>0.0051</b> |
| playback vs. after            | 0.1908               | <b>0.0192</b> | 0.7333        | 0.1337        | <b>0.0054</b> | 0.0926               | 0.4990  | 0.1549        | 1.0000        | 0.1315        |
|                               | <b>50-kHz sounds</b> |               |               |               |               | <b>22-kHz sounds</b> |         |               |               |               |
| before vs. playback           | <b>0.0390</b>        | <b>0.0084</b> | 0.1365        | <b>0.0347</b> | <b>0.0000</b> | 0.2301               | 0.0745  | 0.5695        | <b>0.0413</b> | <b>0.0079</b> |
| before vs. after              | <b>0.0010</b>        | <b>0.0025</b> | <b>0.0279</b> | <b>0.0042</b> | <b>0.0000</b> | <b>0.0018</b>        | 0.5076  | <b>0.0139</b> | <b>0.0413</b> | <b>0.0000</b> |
| playback vs. after            | <b>0.0072</b>        | <b>0.0076</b> | <b>0.0126</b> | <b>0.0131</b> | <b>0.0000</b> | <b>0.0094</b>        | 0.7794  | <b>0.0042</b> | <b>0.0342</b> | <b>0.0001</b> |

**Table S4.** Evaluation of changes in time spent in the speaker's half **before** (i.e. average time spent from -30 s to -10 s time-intervals) vs. during **playback** (i.e. 0 s time-interval) vs. **after** the playback (i.e. average from 10 s to 30 s time-intervals); significant values ( $p < 0.05$ ) marked in bold, all Wilcoxon test. Analyzed were the control rats (0-Trial), and rats which underwent fear-conditioning with different number of shocks (1-Trial, 6-Trial, 10-Trial) as well as all the rats together, which one day later were exposed to ultrasonic playbacks (50-kHz USV, 50-kHz tones, 22-kHz USV, 22-kHz tones; with averaged results for USV and tones, i.e. sounds). Please note more instances of significance in case of "sounds" in comparison with USV and tone playbacks.

| time-interval [s]<br>/ group | 0-Trial              | 1-Trial       | 6-Trial       | 10-Trial      | all rats      | 0-Trial              | 1-Trial       | 6-Trial       | 10-Trial      | all rats      |
|------------------------------|----------------------|---------------|---------------|---------------|---------------|----------------------|---------------|---------------|---------------|---------------|
| # of rats                    | n = 37               | n = 16        | n = 20        | n = 19        | n = 92        | n = 37               | n = 16        | n = 20        | n = 19        | n = 92        |
| <b>HR changes</b>            |                      |               |               |               |               |                      |               |               |               |               |
|                              | <b>50-kHz USV</b>    |               |               |               |               | <b>22-kHz USV</b>    |               |               |               |               |
| -120 to 180                  | <b>0.0000</b>        | 0.1092        | <b>0.0244</b> | <b>0.0009</b> | <b>0.0000</b> | <b>0.0000</b>        | <b>0.0001</b> | <b>0.0000</b> | <b>0.0015</b> | <b>0.0000</b> |
| -60 to 60                    | <b>0.0000</b>        | 0.1797        | <b>0.0047</b> | <b>0.0235</b> | <b>0.0000</b> | <b>0.0000</b>        | <b>0.0020</b> | <b>0.0004</b> | <b>0.0007</b> | <b>0.0000</b> |
| -10 to 10                    | 0.0572               | 0.3798        | 0.4620        | 0.1956        | 0.1030        | <b>0.0000</b>        | 0.0548        | <b>0.0023</b> | 0.0799        | <b>0.0000</b> |
| 0 to 30                      | <b>0.0000</b>        | <b>0.0009</b> | 0.2371        | 0.0998        | <b>0.0000</b> | <b>0.0007</b>        | 0.1491        | 0.3470        | 0.2203        | <b>0.0002</b> |
| -120 to -100                 | 0.0974               | 0.3453        | 0.7736        | 0.5157        | 0.6169        | 0.7656               | 0.5506        | 0.9874        | 0.5203        | 0.8449        |
| -30 to -10                   | 0.2880               | 0.6514        | 0.6106        | 0.6918        | 0.5452        | 0.6547               | 0.4724        | 0.6065        | 0.4317        | 0.7644        |
|                              | <b>50-kHz tone</b>   |               |               |               |               | <b>22-kHz tone</b>   |               |               |               |               |
| -120 to 180                  | 0.0834               | 0.8709        | <b>0.0000</b> | <b>0.0180</b> | <b>0.0000</b> | <b>0.0000</b>        | <b>0.0000</b> | <b>0.0026</b> | <b>0.0000</b> | <b>0.0000</b> |
| -60 to 60                    | <b>0.0316</b>        | 0.2341        | 0.0728        | 0.2995        | <b>0.0000</b> | <b>0.0000</b>        | <b>0.0000</b> | <b>0.0000</b> | <b>0.0017</b> | <b>0.0000</b> |
| -10 to 10                    | 0.7613               | 0.2092        | 0.6376        | 0.2924        | 0.5068        | <b>0.0004</b>        | <b>0.0498</b> | <b>0.0032</b> | 0.6850        | <b>0.0000</b> |
| 0 to 30                      | 0.3566               | <b>0.0244</b> | 0.1444        | 0.2703        | <b>0.0011</b> | <b>0.0023</b>        | 0.2490        | 0.0664        | 0.4954        | <b>0.0001</b> |
| -120 to -100                 | 0.3299               | 0.7396        | 0.5803        | 0.7762        | 0.5115        | 0.9529               | 0.3022        | 0.2972        | 0.1233        | 0.4441        |
| -30 to -10                   | 0.6259               | 0.8290        | 0.9120        | 0.8056        | 0.6967        | 0.4032               | 0.8628        | 0.2123        | 0.1105        | 0.0797        |
|                              | <b>50-kHz sounds</b> |               |               |               |               | <b>22-kHz sounds</b> |               |               |               |               |
| -120 to 180                  | <b>0.0001</b>        | 0.7374        | <b>0.0000</b> | <b>0.0000</b> | <b>0.0000</b> | <b>0.0000</b>        | <b>0.0000</b> | <b>0.0000</b> | <b>0.0000</b> | <b>0.0000</b> |
| -60 to 60                    | <b>0.0002</b>        | 0.3155        | <b>0.0041</b> | <b>0.0227</b> | <b>0.0000</b> | <b>0.0000</b>        | <b>0.0000</b> | <b>0.0000</b> | <b>0.0001</b> | <b>0.0000</b> |
| -10 to 10                    | 0.1563               | 0.5698        | 0.1102        | 0.1335        | <b>0.0146</b> | <b>0.0001</b>        | <b>0.0033</b> | <b>0.0011</b> | 0.2058        | <b>0.0000</b> |
| 0 to 30                      | <b>0.0006</b>        | <b>0.0021</b> | 0.0771        | <b>0.0117</b> | <b>0.0000</b> | <b>0.0012</b>        | 0.1035        | 0.0640        | 0.2564        | <b>0.0000</b> |
| -120 to -100                 | 0.2500               | 0.8932        | 0.7287        | 0.4385        | 0.9645        | 0.9221               | 0.3679        | 0.3035        | 0.6918        | 0.9442        |
| -30 to -10                   | 0.5289               | 0.6319        | 0.9512        | 0.9487        | 0.8737        | 0.5843               | 0.6457        | 0.8607        | 0.0979        | 0.3004        |

**Table S5.** Evaluation of changes in **heart rate (HR)** around playback of ultrasounds (50-kHz USV, 50-kHz tones, 22-kHz USV, 22-kHz tones; with averaged results for USV and tones, i.e. sounds) presented during the 0 s time-interval (from -120 s to 180 s, -60 s to 60 s, -10 s to 10 s), as well as during the control intervals before playback (from -120 s to -100 s, -30 s to -10 s) observed in control rats (0-Trial), and rats which underwent fear-conditioning with different number of shocks (1-Trial, 6-Trial, 10-Trial) as well as all the rats analyzed together, all Friedman test, with  $p < 0.05$  values in bold. Please note  $p > 0.05$  values for all -120 to -100 s and -30 to -10 s intervals.

| group:                 | 0-Trial              | 1-Trial | 6-Trial       | 10-Trial      | all rats      | 0-Trial              | 1-Trial       | 6-Trial        | 10-Trial      | all rats      |
|------------------------|----------------------|---------|---------------|---------------|---------------|----------------------|---------------|----------------|---------------|---------------|
| n                      | n = 37               | n = 16  | n = 20        | n = 19        | n = 92        | n = 37               | n = 16        | n = 20         | n = 19        | n = 92        |
| <b>heart rate (HR)</b> |                      |         |               |               |               |                      |               |                |               |               |
| time-interval [s]      | <b>50-kHz USV</b>    |         |               |               |               | <b>22-kHz USV</b>    |               |                |               |               |
| before vs. playback    | 0.0750               | 0.1183  | 0.5135        | 0.7628        | 0.2406        | <b>0.0007</b>        | <b>0.0386</b> | <b>0.0057</b>  | <b>0.0269</b> | <b>0.0000</b> |
| before vs. 10 s        | 0.4417               | 0.2775  | 0.2180        | 0.2514        | 0.2008        | <b>0.0001</b>        | <b>0.0038</b> | <b>0.0111</b>  | <b>0.0074</b> | <b>0.0000</b> |
| before vs. 10-30 s     | <b>0.0475</b>        | 0.8160  | 0.0894        | <b>0.0429</b> | <b>0.0027</b> | <b>0.0000</b>        | <b>0.0027</b> | <b>0.0366</b>  | 0.0582        | <b>0.0000</b> |
| before vs. 10-60 s     | <b>0.0190</b>        | 0.8767  | <b>0.0479</b> | <b>0.0298</b> | <b>0.0003</b> | <b>0.0004</b>        | <b>0.0494</b> | 0.0930         | 0.5595        | <b>0.0000</b> |
| -10 s vs. playback     | 0.7186               | 0.1406  | 0.5595        | 0.3341        | 0.9494        | <b>0.0059</b>        | 0.0783        | <b>0.0007</b>  | <b>0.0298</b> | <b>0.0000</b> |
| -10 s vs. 10 s         | 0.0797               | 0.2013  | 0.5016        | 0.0702        | 0.0607        | <b>0.0001</b>        | <b>0.0140</b> | <b>0.0064</b>  | <b>0.0166</b> | <b>0.0000</b> |
| playback vs. 10 s      | <b>0.0047</b>        | 0.7564  | 0.4898        | 0.1531        | <b>0.0117</b> | <b>0.0089</b>        | 0.3259        | 0.1454         | 0.8092        | <b>0.0031</b> |
| playback vs. 10-30 s   | <b>0.0004</b>        | 0.3942  | 0.0967        | 0.0510        | <b>0.0000</b> | <b>0.0052</b>        | 0.4380        | 0.6274         | 0.7022        | <b>0.0318</b> |
| playback vs. 10-60 s   | <b>0.0001</b>        | 0.2553  | 0.0826        | 0.0702        | <b>0.0000</b> | 0.1184               | 1.0000        | 0.6580         | 0.1842        | 0.9795        |
|                        | <b>50-kHz tone</b>   |         |               |               |               | <b>22-kHz tone</b>   |               |                |               |               |
| before vs. playback    | 0.9932               | 0.0703  | 0.7938        | 0.7782        | 0.3971        | 0.8327               | 0.2443        | <b>0.0012</b>  | <b>0.0382</b> | <b>0.0027</b> |
| before vs. 10 s        | 0.8741               | 0.7761  | 0.5016        | 0.1474        | 0.3012        | <b>0.0002</b>        | <b>0.0106</b> | <b>0.0005</b>  | <b>0.0242</b> | <b>0.0000</b> |
| before vs. 10-30 s     | 0.1818               | 0.7564  | 0.2514        | 0.1221        | <b>0.0187</b> | <b>0.0000</b>        | <b>0.0174</b> | <b>0.0008</b>  | 0.1313        | <b>0.0000</b> |
| before vs. 10-60 s     | 0.0733               | 0.7764  | <b>0.0366</b> | 0.1213        | <b>0.0020</b> | <b>0.0011</b>        | 0.0627        | <b>0.0313*</b> | 0.1978        | <b>0.0000</b> |
| -10 s vs. playback     | 0.7933               | 0.1118  | 0.9553        | 0.8617        | 0.5176        | 0.8741               | 0.1550        | <b>0.0106</b>  | 0.5595        | <b>0.0338</b> |
| -10 s vs. 10 s         | 0.9000               | 0.6909  | 0.4666        | 0.1474        | 0.4965        | <b>0.0002</b>        | <b>0.0019</b> | <b>0.0021</b>  | 0.1119        | <b>0.0000</b> |
| playback vs. 10 s      | 0.8505               | 0.3011  | 0.2959        | 0.1387        | 0.1408        | <b>0.0002</b>        | 0.0736        | 0.3411         | 0.0976        | <b>0.0000</b> |
| playback vs. 10-30 s   | 0.1006               | 0.1148  | 0.0702        | 0.1262        | <b>0.0016</b> | <b>0.0076</b>        | 0.1406        | 0.7369         | 0.5197        | <b>0.0118</b> |
| playback vs. 10-60 s   | <b>0.0128</b>        | 0.0666  | <b>0.0187</b> | 0.1262        | <b>0.0001</b> | 0.8327               | 0.4851        | <b>0.0124</b>  | 0.7475        | 0.6375        |
|                        | <b>50-kHz sounds</b> |         |               |               |               | <b>22-kHz sounds</b> |               |                |               |               |
| before vs. playback    | 0.3231               | 0.0591  | 0.7089        | 0.8563        | 0.2266        | 0.0660               | 0.0787        | <b>0.0004</b>  | <b>0.0166</b> | <b>0.0000</b> |
| before vs. 10 s        | 0.7514               | 0.2220  | 0.1913        | 0.1165        | 0.2343        | <b>0.0000</b>        | <b>0.0019</b> | <b>0.0027</b>  | <b>0.0141</b> | <b>0.0000</b> |
| before vs. 10-30 s     | 0.0535               | 0.8767  | 0.0793        | <b>0.0329</b> | <b>0.0022</b> | <b>0.0000</b>        | <b>0.0023</b> | <b>0.0046</b>  | 0.0586        | <b>0.0000</b> |
| before vs. 10-60 s     | <b>0.0304</b>        | 0.9588  | <b>0.0169</b> | <b>0.0242</b> | <b>0.0002</b> | <b>0.0001</b>        | <b>0.0174</b> | <b>0.0366</b>  | 0.1842        | <b>0.0000</b> |
| -10 s vs. playback     | 0.8628               | 0.0832  | 0.5135        | 0.6791        | 0.6551        | 0.1597               | <b>0.0299</b> | <b>0.0006</b>  | <b>0.0475</b> | <b>0.0000</b> |
| -10 s vs. 10 s         | 0.3832               | 0.3011  | 0.3165        | 0.0872        | 0.1587        | <b>0.0000</b>        | <b>0.0031</b> | <b>0.0007</b>  | <b>0.0294</b> | <b>0.0000</b> |
| playback vs. 10 s      | 0.1239               | 0.8160  | 0.1305        | 0.0684        | <b>0.0062</b> | <b>0.0011</b>        | 0.0879        | 0.0872         | 0.3760        | <b>0.0001</b> |
| playback vs. 10-30 s   | <b>0.0018</b>        | 0.1337  | <b>0.0124</b> | <b>0.0329</b> | <b>0.0000</b> | <b>0.0040</b>        | 0.1550        | 0.6274         | 0.9679        | <b>0.0077</b> |
| playback vs. 10-60 s   | <b>0.0004</b>        | 0.0557  | <b>0.0036</b> | <b>0.0329</b> | <b>0.0000</b> | 0.0635               | 0.6051        | 0.1474         | 0.3341        | 0.7470        |

**Table S6.** Evaluation of changes in heart rate (HR) around the time of ultrasonic playback, i.e. between **before** (i.e. average time spent from -30 s to -10 s time-intervals) or **immediately before** (at -10 s time-interval) vs. during **playback** (i.e. 0 s time-interval) vs. **after** the playback (i.e. at 10 s time-interval, vs. average from 10 s to 30 s or from 10 s to 60 s time-intervals); significant values ( $p < 0.05$ ) marked in bold, all Wilcoxon test. Analyzed were the control rats (0-Trial), and rats which underwent fear-conditioning with different number of shocks (1-Trial, 6-Trial, 10-Trial) as well as all the rats together, which one day later were exposed to ultrasonic playbacks (50-kHz USV, 50-kHz tones, 22-kHz USV, 22-kHz tones; with averaged results for USV and tones, i.e. sounds). Please note the prevalence of significant values in the group of all rats; \* – not significant when two outlying rats were included.



| Differences in heart rate (HR) values following 50-kHz vs. 22-kHz playback |                           |               |               |               |               |                               |               |               |               |               |                                 |               |               |               |               |
|----------------------------------------------------------------------------|---------------------------|---------------|---------------|---------------|---------------|-------------------------------|---------------|---------------|---------------|---------------|---------------------------------|---------------|---------------|---------------|---------------|
| time                                                                       | 50-kHz USV vs. 22-kHz USV |               |               |               |               | 50-kHz tones vs. 22-kHz tones |               |               |               |               | 50-kHz sounds vs. 22-kHz sounds |               |               |               |               |
| groups                                                                     | 0-Trial                   | 1-Trial       | 6-Trial       | 10-Trl.       | all rats      | 0-Trial                       | 1-Trial       | 6-Trial       | 10-Trl.       | all rats      | 0-Trial                         | 1-Trial       | 6-Trial       | 10-Trl.       | all rats      |
| -120                                                                       | 0.4924                    | 0.9176        | 0.5067        | 0.6580        | 0.9322        | 0.1065                        | 0.0703        | 0.3803        | 0.0910        | 0.1121        | 0.1971                          | 0.2775        | 0.5379        | 0.2684        | 0.3198        |
| -110                                                                       | 0.9219                    | 0.6233        | 0.8789        | 0.7782        | 0.9423        | 0.6151                        | 0.1706        | 0.1403        | 0.1446        | 0.3116        | 0.7514                          | 0.2343        | 0.3604        | 0.3958        | 0.4286        |
| -100                                                                       | 0.5923                    | 0.8767        | 0.7172        | 0.8092        | 0.9023        | 0.6887                        | 0.5695        | 0.1615        | 0.2684        | 0.4873        | 0.4699                          | 0.7960        | 0.4330        | 0.4939        | 0.5607        |
| -30                                                                        | 0.4110                    | 0.5180        | 0.9359        | 0.7939        | 0.4914        | 0.5362                        | 0.1089        | 0.8248        | 0.6435        | 0.4824        | 0.2363                          | 0.2343        | 0.8083        | 0.6165        | 0.3937        |
| -20                                                                        | 0.7860                    | 0.3259        | 0.9839        | 0.5328        | 0.8184        | 0.1843                        | 0.0525        | 0.8519        | 0.6165        | 0.2057        | 0.1843                          | <b>0.0386</b> | 0.7089        | 0.4094        | 0.2922        |
| -10                                                                        | 0.8268                    | 0.2553        | 0.8373        | 0.6726        | 0.8274        | 0.3515                        | 0.1406        | 0.6951        | 0.9839        | 0.1225        | 0.4783                          | 0.0929        | 0.7228        | 0.8405        | 0.2515        |
| 0                                                                          | 0.1353                    | 0.0744        | 0.0793        | 0.2684        | <b>0.0021</b> | 0.1080                        | 0.1272        | 0.0731        | 0.5732        | <b>0.0064</b> | 0.0882                          | <b>0.0465</b> | <b>0.0276</b> | 0.0949        | <b>0.0002</b> |
| 10                                                                         | <b>0.0001</b>             | 0.0980        | <b>0.0160</b> | <b>0.0186</b> | <b>0.0000</b> | <b>0.0002</b>                 | <b>0.0008</b> | <b>0.0124</b> | <b>0.0294</b> | <b>0.0000</b> | <b>0.0000</b>                   | <b>0.0106</b> | <b>0.0080</b> | <b>0.0249</b> | <b>0.0000</b> |
| 20                                                                         | <b>0.0000</b>             | <b>0.0090</b> | <b>0.0363</b> | 0.0559        | <b>0.0000</b> | <b>0.0000</b>                 | <b>0.0048</b> | <b>0.0152</b> | 0.1119        | <b>0.0000</b> | <b>0.0000</b>                   | <b>0.0016</b> | <b>0.0080</b> | 0.0534        | <b>0.0000</b> |
| 30                                                                         | <b>0.0004</b>             | <b>0.0174</b> | <b>0.0038</b> | 0.0559        | <b>0.0000</b> | <b>0.0006</b>                 | <b>0.0072</b> | <b>0.0290</b> | <b>0.0347</b> | <b>0.0000</b> | <b>0.0002</b>                   | <b>0.0052</b> | <b>0.0051</b> | <b>0.0269</b> | <b>0.0000</b> |
| 40                                                                         | <b>0.0005</b>             | 0.0627        | <b>0.0400</b> | 0.3760        | <b>0.0000</b> | <b>0.0004</b>                 | <b>0.0016</b> | 0.0570        | 0.0836        | <b>0.0000</b> | <b>0.0004</b>                   | <b>0.0131</b> | <b>0.0008</b> | 0.1712        | <b>0.0000</b> |
| 50                                                                         | <b>0.0071</b>             | 0.0832        | 0.0582        | 0.7172        | <b>0.0011</b> | <b>0.0002</b>                 | 0.0664        | 0.1851        | <b>0.0346</b> | <b>0.0000</b> | <b>0.0002</b>                   | 0.0703        | <b>0.0479</b> | 0.2049        | <b>0.0000</b> |
| 60                                                                         | <b>0.0069</b>             | 0.1089        | 0.1084        | 0.9039        | <b>0.0014</b> | <b>0.0103</b>                 | <b>0.0309</b> | 0.1354        | 0.1650        | <b>0.0001</b> | <b>0.0007</b>                   | <b>0.0262</b> | 0.1084        | 0.4813        | <b>0.0000</b> |
| 70                                                                         | <b>0.0038</b>             | 0.3520        | 0.2250        | 0.8721        | <b>0.0068</b> | <b>0.0143</b>                 | 0.0664        | 0.3507        | 0.2049        | <b>0.0010</b> | <b>0.0008</b>                   | 0.2243        | 0.3048        | 0.3838        | <b>0.0003</b> |
| 80                                                                         | <b>0.0079</b>             | 0.1477        | 0.5016        | 0.5732        | <b>0.0055</b> | 0.0696                        | <b>0.0004</b> | 0.3604        | 0.1071        | <b>0.0002</b> | <b>0.0045</b>                   | <b>0.0072</b> | 0.3317        | 0.2352        | <b>0.0001</b> |
| 90                                                                         | <b>0.0005</b>             | 0.0787        | 0.1560        | 0.4460        | <b>0.0002</b> | <b>0.0085</b>                 | <b>0.0186</b> | 0.3905        | 0.3760        | <b>0.0006</b> | <b>0.0003</b>                   | <b>0.0174</b> | 0.2043        | 0.3547        | <b>0.0000</b> |
| 100                                                                        | <b>0.0008</b>             | <b>0.0262</b> | <b>0.0303</b> | 0.9199        | <b>0.0001</b> | 0.0855                        | 0.0557        | 0.8519        | 0.7172        | <b>0.0357</b> | <b>0.0026</b>                   | <b>0.0140</b> | 0.1354        | 0.7782        | <b>0.0004</b> |
| 110                                                                        | <b>0.0027</b>             | 0.1406        | 0.0894        | 0.5732        | <b>0.0004</b> | 0.1115                        | <b>0.0083</b> | 0.8519        | 0.4688        | <b>0.0161</b> | <b>0.0045</b>                   | <b>0.0200</b> | 0.3317        | 0.4939        | <b>0.0006</b> |
| 120                                                                        | <b>0.0012</b>             | 0.2775        | 0.0894        | 0.8721        | <b>0.0012</b> | 0.0955                        | <b>0.0229</b> | 0.4222        | 0.7771        | <b>0.0087</b> | <b>0.0030</b>                   | 0.1272        | 0.1169        | 0.5869        | <b>0.0005</b> |
| 130                                                                        | <b>0.0056</b>             | 0.1148        | 0.1506        | 0.8248        | <b>0.0025</b> | 0.0750                        | <b>0.0362</b> | 0.7228        | 0.4326        | <b>0.0343</b> | <b>0.0047</b>                   | 0.0703        | 0.5135        | 0.8092        | <b>0.0038</b> |
| 140                                                                        | <b>0.0201</b>             | <b>0.0468</b> | <b>.0438*</b> | 0.7628        | <b>0.0020</b> | <b>0.0169</b>                 | 0.1089        | 0.9839        | 0.6009        | <b>0.0088</b> | <b>0.0039</b>                   | <b>0.0437</b> | 0.2396        | 0.7782        | <b>0.0007</b> |
| 150                                                                        | 0.1049                    | 0.0879        | <b>0.0152</b> | 0.9679        | <b>0.0015</b> | <b>0.0177</b>                 | 0.1406        | 0.8228        | 0.8789        | <b>0.0277</b> | <b>0.0210</b>                   | 0.0929        | 0.1560        | 0.8405        | <b>0.0025</b> |
| 160                                                                        | 0.2032                    | <b>0.0105</b> | <b>0.0349</b> | 0.5197        | <b>0.0034</b> | <b>0.0050</b>                 | 0.0664        | 0.8373        | 0.9679        | <b>0.0102</b> | <b>0.0069</b>                   | <b>0.0319</b> | 0.2043        | 0.6292        | <b>0.0009</b> |
| 170                                                                        | <b>0.0499</b>             | <b>0.0214</b> | <b>0.0251</b> | 0.1474        | <b>0.0001</b> | <b>0.0006</b>                 | 0.0832        | 0.6677        | 0.4688        | <b>0.0006</b> | <b>0.0016</b>                   | <b>0.0299</b> | 0.1005        | 0.2954        | <b>0.0000</b> |
| 180                                                                        | 0.0814                    | 0.1089        | 0.0522        | 0.7172        | <b>0.0033</b> | <b>0.0424</b>                 | 0.0557        | 0.6813        | 0.2954        | <b>.0464*</b> | <b>0.0202</b>                   | <b>0.0200</b> | 0.1506        | 0.8721        | <b>0.0012</b> |

**Table S7.** Statistical evaluation of comparisons between the effects of **50-kHz vs. 22-kHz playback** of USV, tones, as well as of USV and tones averaged (sounds) presented during 0 s time-intervals **on heart rate (HR)** – as reported for time-intervals between -120 s and 180 s; significant values ( $p < 0.05$ ) marked in bold, all Wilcoxon test. Analyzed were the control rats (0-Trial), and rats which underwent fear-conditioning the day before – with different number of shocks (1-Trial, 6-Trial, 10-Trial), as well as all the rats together. Please note the onset of significant values to coincide with the time of the playbacks; \* – not significant when two outlying rats were included.

|                    | 50-kHz USV-playback |               |        |               |               | 50-kHz tones-playback |        |        |        |        | 50-kHz sounds-playback |        |               |               |               |
|--------------------|---------------------|---------------|--------|---------------|---------------|-----------------------|--------|--------|--------|--------|------------------------|--------|---------------|---------------|---------------|
| groups:            | 0-T                 | 6-T           | 10-T   | 6-10-T        | other         | 0-T                   | 6-T    | 10-T   | 6-10-T | other  | 0-T                    | 6-T    | 10-T          | 6-10-T        | other         |
| HR changes         | vs. 1-Trial rats    |               |        |               |               | vs. 1-Trial rats      |        |        |        |        | vs. 1-Trial rats       |        |               |               |               |
| before vs. 10 s    | 0.1909              | 0.0885        | 0.1046 | 0.0569        | 0.0799        | 0.6281                | 0.5037 | 0.2397 | 0.2950 | 0.4011 | 0.3137                 | 0.1519 | 0.0792        | 0.0693        | 0.1223        |
| -10 vs. 10 s       | <b>0.0485</b>       | 0.1810        | 0.0547 | 0.0638        | <b>0.0371</b> | 0.6989                | 0.4639 | 0.1496 | 0.2177 | 0.3698 | 0.2185                 | 0.1225 | 0.0507        | <b>0.0456</b> | 0.0781        |
| before vs. 10-30 s | 0.2334              | 0.1114        | 0.0821 | 0.0569        | 0.0911        | 0.4556                | 0.5665 | 0.2968 | 0.3589 | 0.3646 | 0.1909                 | 0.1660 | <b>0.0314</b> | <b>0.0453</b> | 0.0704        |
| -10 vs. 10-30 s    | 0.0532              | 0.1864        | 0.0608 | 0.0693        | <b>0.0411</b> | 0.5788                | 0.3385 | 0.1798 | 0.1914 | 0.3044 | 0.1211                 | 0.1346 | <b>0.0240</b> | <b>0.0329</b> | <b>0.0444</b> |
| before vs. 10-60 s | 0.1601              | <b>0.0484</b> | 0.0851 | <b>0.0345</b> | 0.0541        | 0.2570                | 0.2934 | 0.2083 | 0.1882 | 0.1822 | 0.1211                 | 0.0561 | <b>0.0314</b> | <b>0.0199</b> | <b>0.0343</b> |
| -10 vs. 10-60 s    | <b>0.0254</b>       | 0.0746        | 0.0637 | <b>0.0379</b> | <b>0.0186</b> | 0.4335                | 0.2934 | 0.1277 | 0.1432 | 0.2167 | 0.0551                 | 0.0667 | <b>0.0341</b> | <b>0.0233</b> | <b>0.0221</b> |

**Table S8.** Comparisons of **heart rate (HR) changes**, i.e. differences in HR value between two periods, in **1-Trial group** (the rats received one electric shock the day before) **vs. other groups** (control, 0-Trial/0-T group; the rats which received 6 shocks, 6-Trial/6-T; 10 shocks, 10-Trial/10-T; the 6-Trial and 10-Trial rats combined, 6-10-T, and all non-1-Trial rats combined, other); significant values ( $p < 0.05$ ) marked in bold, all Mann-Whitney test.

| time-interval [s] / group    | 0-Trial       | 1-Trial       | 6-Trial       | 10-Trial      | all rats      | 0-Trial       | 1-Trial       | 6-Trial       | 10-Trial      | all rats      |
|------------------------------|---------------|---------------|---------------|---------------|---------------|---------------|---------------|---------------|---------------|---------------|
| # of rats                    | n = 37        | n = 16        | n = 20        | n = 19        | n = 92        | n = 37        | n = 16        | n = 20        | n = 19        | n = 92        |
| <b>number of USV emitted</b> |               |               |               |               |               |               |               |               |               |               |
|                              | 50-kHz USV    |               |               |               |               | 22-kHz USV    |               |               |               |               |
| -120 to 180                  | <b>0.0000</b> | <b>0.0000</b> | <b>0.0000</b> | <b>0.0000</b> | <b>0.0000</b> | <b>0.0000</b> | <b>0.0001</b> | <b>0.0000</b> | <b>0.0000</b> | <b>0.0000</b> |
| -60 to 60                    | <b>0.0000</b> | <b>0.0000</b> | <b>0.0000</b> | <b>0.0000</b> | <b>0.0000</b> | <b>0.0000</b> | <b>0.0106</b> | <b>0.0000</b> | <b>0.0000</b> | <b>0.0000</b> |
| -10 to 10                    | <b>0.0000</b> | <b>0.0002</b> | <b>0.0001</b> | 0.4967        | <b>0.0000</b> | <b>0.0073</b> | 0.2111        | <b>0.0084</b> | 0.3130        | <b>0.0000</b> |
| 0 to 30                      | <b>0.0000</b> | 0.2299        | 0.8482        | <b>0.0001</b> | <b>0.0011</b> | 0.9963        | 0.5558        | 0.9420        | <b>0.0150</b> | 0.8622        |
| -120 to -100                 | 0.1869        | 0.5404        | 0.9078        | 0.1409        | 0.4755        | 0.3902        | 0.8669        | 0.2927        | 0.6918        | 0.2883        |
| -30 to -10                   | 0.0701        | 0.2319        | 0.6065        | 0.3679        | 0.1528        | 0.4459        | 0.1462        | 0.1738        | 0.1615        | 0.8348        |
|                              | 50-kHz tone   |               |               |               |               | 22-kHz tone   |               |               |               |               |
| -120 to 180                  | <b>0.0000</b> | <b>0.0000</b> | <b>0.0000</b> | <b>0.0000</b> | <b>0.0000</b> | <b>0.0001</b> | <b>0.0005</b> | <b>0.0318</b> | <b>0.0000</b> | <b>0.0000</b> |
| -60 to 60                    | <b>0.0000</b> | <b>0.0000</b> | <b>0.0000</b> | <b>0.0000</b> | <b>0.0000</b> | <b>0.0025</b> | <b>0.0042</b> | 0.0642        | <b>0.0000</b> | <b>0.0000</b> |
| -10 to 10                    | <b>0.0000</b> | <b>0.0001</b> | <b>0.0001</b> | 0.1942        | <b>0.0000</b> | <b>0.0454</b> | 0.8007        | 0.1778        | 0.0675        | <b>0.0044</b> |
| 0 to 30                      | <b>0.0001</b> | 0.2660        | 0.1779        | <b>0.0001</b> | <b>0.0000</b> | 0.9558        | 0.3345        | 0.6676        | 0.3679        | 0.1597        |
| -120 to -100                 | 0.2276        | 0.2122        | 0.2276        | 0.5308        | 0.1738        | 0.3583        | 0.2574        | 0.2090        | 0.9394        | 0.8765        |
| -30 to -10                   | <b>0.0067</b> | 0.4937        | 0.8382        | <b>0.0441</b> | 0.1975        | 0.7047        | 0.1653        | 0.1561        | 0.8071        | 0.3189        |
|                              | 50-kHz sounds |               |               |               |               | 22-kHz sounds |               |               |               |               |
| -120 to 180                  | <b>0.0000</b> |
| -60 to 60                    | <b>0.0000</b> | <b>0.0000</b> | <b>0.0000</b> | <b>0.0000</b> | <b>0.0000</b> | <b>0.0000</b> | <b>0.0001</b> | <b>0.0000</b> | <b>0.0000</b> | <b>0.0000</b> |
| -10 to 10                    | <b>0.0000</b> | <b>0.0000</b> | <b>0.0001</b> | <b>0.0266</b> | <b>0.0000</b> | <b>0.0065</b> | 0.1128        | <b>0.0012</b> | 0.1346        | <b>0.0000</b> |
| 0 to 30                      | <b>0.0000</b> | 0.0705        | 0.4621        | <b>0.0000</b> | <b>0.0000</b> | 0.9974        | 0.7748        | 0.7665        | 0.0963        | 0.4743        |
| -120 to -100                 | 0.0921        | 0.2167        | 0.7491        | 0.0558        | <b>0.0291</b> | 0.7463        | 0.4046        | 0.1620        | 0.7548        | 0.8233        |
| -30 to -10                   | <b>0.0030</b> | 0.1466        | 0.8623        | <b>0.0320</b> | 0.1597        | 0.9775        | 0.2801        | 1.0000        | 0.2101        | 0.4878        |

**Table S9.** Evaluation of changes in the **number of USV emitted around playback** of ultrasounds (50-kHz USV, 50-kHz tones, 22-kHz USV, 22-kHz tones; with averaged results for USV and tones, i.e. sounds) presented during the 0 s time-interval (from -120 s to 180 s, -60 s to 60 s, -10 s to 10 s), as well as during the control intervals before playback (from -120 s to -100 s, -30 s to -10 s) observed in control rats (0-Trial), and rats which underwent fear-conditioning with different number of shocks (1-Trial, 6-Trial, 10-Trial) as well as all the rats analyzed together, all Friedman test, with  $p < 0.05$  values in bold. Please note  $p > 0.05$  values for -120 to -100 s and -30 to -10 s intervals.

| group:                | 0-Trial       | 1-Trial       | 6-Trial       | 10-Trial      | all rats      | 0-Trial       | 1-Trial       | 6-Trial       | 10-Trial      | all rats      |
|-----------------------|---------------|---------------|---------------|---------------|---------------|---------------|---------------|---------------|---------------|---------------|
| n                     | n = 37        | n = 16        | n = 20        | n = 19        | n = 92        | n = 37        | n = 16        | n = 20        | n = 19        | n = 92        |
| number of USV emitted |               |               |               |               |               |               |               |               |               |               |
| time-interval [s]     | 50-kHz USV    |               |               |               |               | 22-kHz USV    |               |               |               |               |
| before vs. playback   | <b>0.0000</b> | <b>0.0027</b> | <b>0.0005</b> | <b>0.0003</b> | <b>0.0000</b> | <b>0.0168</b> | 0.2367        | <b>0.0060</b> | <b>0.0077</b> | <b>0.0000</b> |
| before vs. 10 s       | <b>0.0000</b> | <b>0.0022</b> | <b>0.0008</b> | <b>0.0005</b> | <b>0.0000</b> | <b>0.0107</b> | 0.2249        | <b>0.0209</b> | <b>0.0029</b> | <b>0.0000</b> |
| before vs. 10-30 s    | <b>0.0000</b> | <b>0.0015</b> | <b>0.0008</b> | <b>0.0004</b> | <b>0.0000</b> | <b>0.0025</b> | <b>0.0357</b> | <b>0.0022</b> | <b>0.0022</b> | <b>0.0000</b> |
| before vs. 10-120 s   | <b>0.0000</b> | <b>0.0010</b> | <b>0.0004</b> | <b>0.0005</b> | <b>0.0000</b> | <b>0.0006</b> | <b>0.0093</b> | <b>0.0004</b> | <b>0.0004</b> | <b>0.0000</b> |
|                       | 50-kHz tone   |               |               |               |               | 22-kHz tone   |               |               |               |               |
| before vs. playback   | <b>0.0000</b> | <b>0.0019</b> | <b>0.0015</b> | <b>0.0002</b> | <b>0.0000</b> | <b>0.0284</b> | 0.1159        | 0.3980        | 0.3105        | <b>0.0024</b> |
| before vs. 10 s       | <b>0.0000</b> | <b>0.0012</b> | <b>0.0015</b> | <b>0.0002</b> | <b>0.0000</b> | <b>0.0058</b> | 0.1159        | 0.0972        | 0.5541        | <b>0.0007</b> |
| before vs. 10-30 s    | <b>0.0000</b> | <b>0.0014</b> | <b>0.0004</b> | <b>0.0002</b> | <b>0.0000</b> | <b>0.0035</b> | <b>0.0277</b> | <b>0.0099</b> | 0.0712        | <b>0.0000</b> |
| before vs. 10-120 s   | <b>0.0000</b> | <b>0.0018</b> | <b>0.0002</b> | <b>0.0003</b> | <b>0.0000</b> | <b>0.0014</b> | <b>0.0044</b> | <b>0.0045</b> | 0.1330        | <b>0.0000</b> |
|                       | 50-kHz sounds |               |               |               |               | 22-kHz sounds |               |               |               |               |
| before vs. playback   | <b>0.0000</b> | <b>0.0008</b> | <b>0.0004</b> | <b>0.0002</b> | <b>0.0000</b> | <b>0.0137</b> | 0.1235        | <b>0.0157</b> | <b>0.0342</b> | <b>0.0000</b> |
| before vs. 10 s       | <b>0.0000</b> | <b>0.0008</b> | <b>0.0005</b> | <b>0.0001</b> | <b>0.0000</b> | <b>0.0014</b> | 0.1159        | <b>0.0037</b> | <b>0.0108</b> | <b>0.0000</b> |
| before vs. 10-30 s    | <b>0.0000</b> | <b>0.0008</b> | <b>0.0003</b> | <b>0.0002</b> | <b>0.0000</b> | <b>0.0012</b> | <b>0.0173</b> | <b>0.0018</b> | <b>0.0052</b> | <b>0.0000</b> |
| before vs. 10-120 s   | <b>0.0000</b> | <b>0.0006</b> | <b>0.0002</b> | <b>0.0003</b> | <b>0.0000</b> | <b>0.0002</b> | <b>0.0037</b> | <b>0.0004</b> | <b>0.0229</b> | <b>0.0000</b> |

**Table S10.** Evaluation of changes in the **number of USV** around the time of ultrasonic playback, i.e. between **before** (i.e. average time spent from -30 s to -10 s time-intervals) vs. during **playback** (i.e. 0 s time -interval) vs. **after** the playback (i.e. at 10 s time-interval, vs. average from 10 s to 30 s or from 10 s to 120 s time-intervals); significant values ( $p < 0.05$ ) marked in bold, all Wilcoxon test. Analyzed were the control rats (0-Trial), and rats which underwent fear-conditioning with different number of electric shocks (1-Trial, 6-Trial, 10-Trial) as well as all the rats together, which one day later were exposed to ultrasonic playbacks (50-kHz USV, 50-kHz tones, 22-kHz USV, 22-kHz tones; with averaged results for USV and tones, i.e. sounds). Please note the prevalence of significant values in all the groups.

| Differences in the number of USV following 50-kHz vs. 22-kHz playback |                           |               |               |               |               |                               |               |               |               |               |                                 |               |               |               |               |
|-----------------------------------------------------------------------|---------------------------|---------------|---------------|---------------|---------------|-------------------------------|---------------|---------------|---------------|---------------|---------------------------------|---------------|---------------|---------------|---------------|
| time                                                                  | 50-kHz USV vs. 22-kHz USV |               |               |               |               | 50-kHz tones vs. 22-kHz tones |               |               |               |               | 50-kHz sounds vs. 22-kHz sounds |               |               |               |               |
| groups                                                                | 0-Trial                   | 1-Trial       | 6-Trial       | 10-Trial      | all rats      | 0-Trial                       | 1-Trial       | 6-Trial       | 10-Trial      | all rats      | 0-Trial                         | 1-Trial       | 6-Trial       | 10-Trial      | all rats      |
| -120                                                                  | 0.5698                    | <b>0.0431</b> | 0.6566        | 0.6858        | 0.4427        | 0.8734                        | 0.3452        | 0.6744        | 0.7263        | 0.9904        | 0.5360                          | 0.0587        | 0.9063        | 0.8658        | 0.3298        |
| -110                                                                  | 0.1599                    | 0.0935        | 0.6726        | 0.3433        | 0.0661        | 0.8582                        | 0.8551        | 0.6002        | 0.4755        | 0.7364        | 0.3454                          | 0.4412        | 0.6356        | 0.3305        | 0.2070        |
| -100                                                                  | 0.5098                    | 0.3613        | 0.9645        | 0.3452        | 0.5098        | 0.6114                        | 0.2851        | 0.7998        | 1.0000        | 0.4456        | 0.3233                          | 0.0935        | 0.5761        | 0.4148        | 0.2257        |
| -30                                                                   | 0.7089                    | 0.1088        | 0.9326        | 0.1088        | 0.7938        | 0.6496                        | 0.9326        | NR            | 0.3452        | 0.6496        | 0.4072                          | 0.0679        | 0.5541        | 0.1730        | 0.7775        |
| -20                                                                   | 0.4859                    | 0.2733        | 0.5930        | 0.5002        | 0.6359        | 0.7089                        | 0.5930        | 0.7150        | 0.4772        | 0.9032        | 0.9569                          | 0.5541        | 0.7150        | 0.7989        | 0.9569        |
| -10                                                                   | 0.7282                    | NR            | 0.5294        | 0.5002        | 0.7282        | 0.9184                        | 0.5294        | 0.1380        | 0.8886        | 0.8570        | 0.9937                          | 0.1056        | 0.6744        | 0.7671        | 0.7996        |
| 0                                                                     | <b>0.0000</b>             | 0.0597        | <b>0.0052</b> | <b>0.0065</b> | <b>0.0000</b> | <b>0.0000</b>                 | <b>0.0231</b> | <b>0.0019</b> | <b>0.0007</b> | <b>0.0000</b> | <b>0.0000</b>                   | <b>0.0202</b> | <b>0.0010</b> | <b>0.0009</b> | <b>0.0000</b> |
| 10                                                                    | <b>0.0000</b>             | <b>0.0164</b> | <b>0.0008</b> | <b>0.0050</b> | <b>0.0000</b> | <b>0.0000</b>                 | <b>0.0277</b> | <b>0.0015</b> | <b>0.0003</b> | <b>0.0000</b> | <b>0.0000</b>                   | <b>0.0092</b> | <b>0.0007</b> | <b>0.0010</b> | <b>0.0000</b> |
| 20                                                                    | <b>0.0000</b>             | <b>0.0207</b> | <b>0.0018</b> | <b>0.0050</b> | <b>0.0000</b> | <b>0.0000</b>                 | 0.1551        | <b>0.0033</b> | <b>0.0006</b> | <b>0.0000</b> | <b>0.0000</b>                   | <b>0.0360</b> | <b>0.0006</b> | <b>0.0008</b> | <b>0.0000</b> |
| 30                                                                    | <b>0.0000</b>             | 0.1141        | <b>0.0015</b> | <b>0.0121</b> | <b>0.0000</b> | <b>0.0000</b>                 | 0.1549        | <b>0.0021</b> | 0.0979        | <b>0.0000</b> | <b>0.0000</b>                   | <b>0.0342</b> | <b>0.0007</b> | <b>0.0139</b> | <b>0.0000</b> |
| 40                                                                    | <b>0.0000</b>             | 0.3863        | <b>0.0106</b> | 0.1055        | <b>0.0001</b> | <b>0.0000</b>                 | 0.8127        | <b>0.0015</b> | 0.3152        | <b>0.0000</b> | <b>0.0000</b>                   | 0.3824        | <b>0.0016</b> | 0.1075        | <b>0.0000</b> |
| 50                                                                    | <b>0.0011</b>             | 1.0000        | <b>0.0052</b> | 0.0557        | <b>0.0027</b> | <b>0.0000</b>                 | 0.2300        | <b>0.0135</b> | <b>0.0086</b> | <b>0.0000</b> | <b>0.0000</b>                   | 0.7007        | <b>0.0009</b> | <b>0.0121</b> | <b>0.0000</b> |
| 60                                                                    | <b>0.0005</b>             | 0.3505        | <b>0.0048</b> | 0.0787        | <b>0.0003</b> | <b>0.0000</b>                 | 0.1551        | <b>0.0120</b> | <b>0.0042</b> | <b>0.0000</b> | <b>0.0000</b>                   | 0.3454        | <b>0.0012</b> | <b>0.0060</b> | <b>0.0000</b> |
| 70                                                                    | <b>0.0055</b>             | 0.5076        | <b>0.0288</b> | 0.2209        | <b>0.0128</b> | <b>0.0020</b>                 | 0.4990        | 0.1330        | 0.1467        | <b>0.0050</b> | <b>0.0006</b>                   | 0.5937        | <b>0.0229</b> | 0.0664        | <b>0.0017</b> |
| 80                                                                    | <b>0.0009</b>             | 0.6726        | <b>0.0150</b> | 0.0935        | <b>0.0022</b> | <b>0.0006</b>                 | 0.2135        | 0.1159        | <b>0.0254</b> | <b>0.0016</b> | <b>0.0002</b>                   | 0.3863        | <b>0.0184</b> | <b>0.0199</b> | <b>0.0006</b> |
| 90                                                                    | <b>0.0056</b>             | 0.7353        | <b>0.0113</b> | 0.2945        | <b>0.0132</b> | <b>0.0022</b>                 | 0.3454        | 0.3078        | <b>0.0454</b> | <b>0.0048</b> | <b>0.0007</b>                   | 0.6566        | <b>0.0186</b> | <b>0.0382</b> | <b>0.0017</b> |
| 100                                                                   | <b>0.0263</b>             | 0.5286        | 0.1261        | 0.1361        | 0.0587        | <b>0.0001</b>                 | 0.0910        | 0.0593        | <b>0.0499</b> | <b>0.0001</b> | <b>0.0001</b>                   | 0.2860        | <b>0.0310</b> | <b>0.0258</b> | <b>0.0002</b> |
| 110                                                                   | <b>0.0080</b>             | 0.5930        | 0.2845        | 0.0506        | <b>0.0169</b> | <b>0.0002</b>                 | 0.5937        | 0.1851        | <b>0.0185</b> | <b>0.0003</b> | <b>0.0001</b>                   | 0.5049        | 0.1005        | <b>0.0119</b> | <b>0.0001</b> |
| 120                                                                   | <b>0.0100</b>             | 0.0910        | 0.4769        | 0.4755        | <b>0.0180</b> | <b>0.0019</b>                 | 0.3270        | 0.2411        | <b>0.0180</b> | <b>0.0033</b> | <b>0.0005</b>                   | 0.1235        | 0.3454        | <b>0.0150</b> | <b>0.0012</b> |
| 130                                                                   | 0.1110                    | 0.5286        | 0.7671        | 0.6465        | 0.1696        | <b>0.0346</b>                 | 0.8339        | 0.7794        | 0.1688        | <b>0.0473</b> | <b>0.0154</b>                   | 0.7598        | 0.8385        | 0.2393        | <b>0.0305</b> |
| 140                                                                   | <b>0.0280</b>             | 0.8927        | 0.2604        | 0.1823        | <b>0.0339</b> | <b>0.0000</b>                 | NR            | <b>0.0117</b> | <b>0.0117</b> | <b>0.0000</b> | <b>0.0001</b>                   | 0.7874        | <b>0.0454</b> | <b>0.0076</b> | <b>0.0001</b> |
| 150                                                                   | 0.4545                    | 0.6002        | 0.4069        | 0.9326        | 0.6959        | <b>0.0012</b>                 | 1.0000        | <b>0.0425</b> | 0.0663        | <b>0.0021</b> | <b>0.0143</b>                   | 0.5408        | 0.2026        | 0.1029        | <b>0.0360</b> |
| 160                                                                   | 0.0536                    | 0.2249        | 0.4412        | 0.5076        | 0.0761        | <b>0.0007</b>                 | <b>0.0431</b> | <b>0.0251</b> | 0.0687        | <b>0.0004</b> | <b>0.0001</b>                   | 0.0910        | <b>0.0077</b> | 0.4420        | <b>0.0001</b> |
| 170                                                                   | <b>0.0125</b>             | 0.1088        | 0.1235        | 0.5940        | <b>0.0174</b> | 0.0799                        | NR            | 0.2626        | 0.2076        | <b>.0323*</b> | <b>0.0030</b>                   | 0.1088        | <b>.0284*</b> | 0.2049        | <b>0.0011</b> |
| 180                                                                   | 0.0953                    | 0.1088        | 0.9057        | 0.1775        | 0.0953        | 0.0520                        | 1.0000        | 0.1730        | <b>0.0431</b> | <b>.0324*</b> | <b>0.0249</b>                   | 0.1441        | 0.6241        | 0.0910        | <b>0.0180</b> |

**Table S11.** Statistical evaluation of comparisons between the effects of **50-kHz vs. 22-kHz playback** of USV, tones, as well as of USV and tones averaged (sounds) presented during 0 s time-intervals **on the number of emitted vocalizations (USV)** – as reported for time-intervals between -120 s and 180 s; significant values ( $p < 0.05$ ) marked in bold, all Wilcoxon test. Analyzed were the control rats (0-Trial), and rats which underwent fear-conditioning the day before – with different number of shocks (1-Trial, 6-Trial, 10-Trial), as well as all the rats together. Please note the onset of significant values to coincide with the onset of the playbacks; NR – the test gave no results; \* – not significant when two outlying rats were included.

| groups                                                               | number of USV  |                |                  |                 | parameters of 50-kHz USV |    |                |
|----------------------------------------------------------------------|----------------|----------------|------------------|-----------------|--------------------------|----|----------------|
| USV                                                                  | total USV      | 50-kHz USV     | short 22-kHz USV | long 22-kHz USV | duration [ms]            | n  | MPF [kHz]      |
| <b>USV emitted to 50-kHz USV-playback (0–120 s time-intervals)</b>   |                |                |                  |                 |                          |    |                |
| 0-Trial                                                              | 41.2 ± 7.1     | 39.9 ± 6.9     | 0.9 ± 0.2        | 0.3 ± 0.3       | 27.0 ± 1.7               | 19 | 61.7 ± 2.2     |
| 1-Trial                                                              | 59.1 ± 19.5    | 57.8 ± 19.3    | 1.3 ± 0.6        | 0.0 ± 0.0       | 26.9 ± 2.1               | 9  | 59.7 ± 1.6     |
| 6-Trial                                                              | 86.4 ± 16.5    | 85.7 ± 16.5    | 0.8 ± 0.3        | 0.0 ± 0.0       | 29.3 ± 2.6               | 14 | 61.1 ± 0.6     |
| 10-Trial                                                             | 97.5 ± 17.5    | 95.8 ± 17.2    | 1.7 ± 0.7        | 0.0 ± 0.0       | 30.1 ± 1.8               | 15 | 60.8 ± 0.9     |
| all FC'ed                                                            | 82.3 ± 10.3    | 81.0 ± 10.2    | 1.2 ± 0.3        | 0.0 ± 0.0       | 29.1 ± 1.3               | 38 | 60.7 ± 0.6     |
| all rats                                                             | 65.7 ± 7.1     | 64.5 ± 7.0     | 1.1 ± 0.2        | 0.1 ± 0.1       | 28.4 ± 1.0               | 57 | 61.0 ± 0.8     |
| <b>USV emitted to 22-kHz USV-playback (0–120 s time-intervals)</b>   |                |                |                  |                 |                          |    |                |
| 0-Trial                                                              | 13.5 ± 3.6 ### | 12.9 ± 3.6 ### | 0.6 ± 0.3        | 0.0 ± 0.0       | 21.9 ± 2.1               |    | 58.1 ± 1.9     |
| 1-Trial                                                              | 14.5 ± 5.4 ##  | 13.4 ± 5.3 ##  | 1.1 ± 0.6        | 0.0 ± 0.0       | 20.2 ± 2.4 #             |    | 54.5 ± 3.9 #   |
| 6-Trial                                                              | 32.2 ± 7.6 ### | 31.9 ± 7.6 ### | 0.3 ± 0.1        | 0.0 ± 0.0       | 29.4 ± 2.4               |    | 60.1 ± 0.7     |
| 10-Trial                                                             | 30.9 ± 9.8 ##  | 29.9 ± 9.8 ##  | 1.1 ± 0.5        | 0.0 ± 0.0       | 23.8 ± 2.4 #             |    | 58.9 ± 1.8     |
| all FC'ed                                                            | 26.6 ± 4.7 ### | 25.8 ± 4.7 ### | 0.8 ± 0.3        | 0.0 ± 0.0       | 25.1 ± 1.5 ###           |    | 58.4 ± 1.1 ##  |
| all rats                                                             | 21.4 ± 3.2 ### | 20.6 ± 3.2 ### | 0.7 ± 0.2        | 0.0 ± 0.0       | 24.0 ± 1.2 ###           |    | 58.3 ± 1.0 ##  |
| <b>USV emitted to 50-kHz tone-playback (0–120 s time-intervals)</b>  |                |                |                  |                 |                          |    |                |
| 0-Trial                                                              | 41.4 ± 6.6     | 40.4 ± 6.5     | 1.0 ± 0.4        | 0.0 ± 0.0       | 27.0 ± 2.0               | 18 | 58.6 ± 0.9     |
| 1-Trial                                                              | 49.3 ± 16.2    | 48.6 ± 16.1    | 0.8 ± 0.2        | 0.0 ± 0.0       | 23.8 ± 2.9               | 9  | 58.2 ± 1.8     |
| 6-Trial                                                              | 76.0 ± 18.5    | 74.6 ± 18.4    | 1.4 ± 0.5        | 0.0 ± 0.0       | 32.8 ± 3.3               | 11 | 61.0 ± 0.6     |
| 10-Trial                                                             | 76.3 ± 15.3    | 75.4 ± 15.2    | 0.9 ± 0.4        | 0.0 ± 0.0       | 31.0 ± 2.1               | 13 | 61.1 ± 0.5     |
| all FC'ed                                                            | 68.3 ± 9.7     | 67.3 ± 9.7     | 1.0 ± 0.2        | 0.0 ± 0.0       | 29.6 ± 1.7               | 33 | 60.3 ± 0.6     |
| all rats                                                             | 57.5 ± 6.5     | 56.5 ± 6.5     | 1.0 ± 0.2        | 0.0 ± 0.0       | 28.7 ± 1.3               | 51 | 59.7 ± 0.5     |
| <b>USV emitted to 22-kHz tone-playback (0–120 s time-intervals)</b>  |                |                |                  |                 |                          |    |                |
| 0-Trial                                                              | 6.6 ± 2.1 ###  | 6.1 ± 2.0 ###  | 0.5 ± 0.3        | 0.0 ± 0.0       | 18.2 ± 2.1 #             |    | 55.5 ± 2.0     |
| 1-Trial                                                              | 16.0 ± 6.9 #   | 15.3 ± 6.9 #   | 0.7 ± 0.5        | 0.0 ± 0.0       | 28.5 ± 7.9               |    | 54.2 ± 3.0     |
| 6-Trial                                                              | 18.1 ± 5.5 ### | 17.8 ± 5.5 ### | 0.4 ± 0.2        | 0.0 ± 0.0       | 28.7 ± 3.0               |    | 59.4 ± 0.6     |
| 10-Trial                                                             | 23.3 ± 8.1 ### | 23.2 ± 8.1 ### | 0.1 ± 0.1 #      | 0.0 ± 0.0       | 25.1 ± 2.2 ##            |    | 58.3 ± 1.4     |
| all FC'ed                                                            | 19.3 ± 3.9 ### | 18.9 ± 3.9 ### | 0.4 ± 0.2 ##     | 0.0 ± 0.0       | 27.2 ± 2.5 ##            |    | 57.5 ± 1.0 #   |
| all rats                                                             | 14.2 ± 2.6 ### | 13.8 ± 2.6 ### | 0.4 ± 0.1 ##     | 0.0 ± 0.0       | 24.0 ± 1.8 ###           |    | 56.8 ± 1.0 ##  |
| <b>USV emitted to 50-kHz sound-playback (0–120 s time-intervals)</b> |                |                |                  |                 |                          |    |                |
| 0-Trial                                                              | 41.3 ± 6.0     | 40.1 ± 5.9     | 1.0 ± 0.3        | 0.1 ± 0.1       | 27.7 ± 1.5               | 24 | 60.7 ± 1.1     |
| 1-Trial                                                              | 54.2 ± 17.4    | 53.2 ± 17.2    | 1.0 ± 0.4        | 0.0 ± 0.0       | 24.0 ± 2.1               | 12 | 59.6 ± 1.2     |
| 6-Trial                                                              | 81.2 ± 16.4    | 80.1 ± 16.3    | 1.1 ± 0.3        | 0.0 ± 0.0       | 29.8 ± 2.8               | 14 | 60.4 ± 0.6     |
| 10-Trial                                                             | 86.9 ± 15.1    | 85.6 ± 15.0    | 1.3 ± 0.4        | 0.0 ± 0.0       | 29.2 ± 1.8               | 16 | 60.9 ± 0.7     |
| all FC'ed                                                            | 75.3 ± 9.4     | 74.2 ± 9.3     | 1.1 ± 0.2        | 0.0 ± 0.0       | 27.9 ± 1.3               | 42 | 60.4 ± 0.5     |
| all rats                                                             | 61.6 ± 6.3     | 60.5 ± 6.3     | 1.1 ± 0.2        | 0.1 ± 0.1       | 27.8 ± 1.0               | 66 | 60.5 ± 0.5     |
| <b>USV emitted to 22-kHz sound-playback (0–120 s time-intervals)</b> |                |                |                  |                 |                          |    |                |
| 0-Trial                                                              | 10.1 ± 2.7 ### | 9.5 ± 2.6 ###  | 0.6 ± 0.3        | 0.0 ± 0.0       | 18.4 ± 1.6 ##            |    | 58.3 ± 1.6     |
| 1-Trial                                                              | 15.3 ± 4.7 #   | 14.3 ± 4.7 #   | 0.9 ± 0.4        | 0.0 ± 0.0       | 27.8 ± 6.8               |    | 51.9 ± 3.4 ##  |
| 6-Trial                                                              | 25.2 ± 5.9 ### | 24.8 ± 5.9 ### | 0.3 ± 0.1 #      | 0.0 ± 0.0       | 28.3 ± 2.1               |    | 59.8 ± 0.6     |
| 10-Trial                                                             | 27.1 ± 8.3 ### | 26.6 ± 8.3 ### | 0.6 ± 0.3        | 0.0 ± 0.0       | 23.2 ± 2.2 ##            |    | 58.0 ± 1.6 #   |
| all FC'ed                                                            | 23.0 ± 3.8 ### | 22.4 ± 3.8 ### | 0.6 ± 0.2 #      | 0.0 ± 0.0       | 26.1 ± 2.0 ##            |    | 57.1 ± 1.2 ### |
| all rats                                                             | 17.8 ± 2.6 ### | 17.2 ± 2.6 ### | 0.6 ± 0.1 ##     | 0.0 ± 0.0       | 23.2 ± 1.5 ###           |    | 57.6 ± 0.9 ### |

**Table S12.** Comparison of **number of USV of different types** and **selected characteristics of 50-kHz USV** emitted during playback sessions, i.e. during the 10-s-long playback and 110 s afterwards, **in response to 50- vs. 22-kHz playback** (USV, tone and sounds) in control (0-Trial, n = 37), fear-conditioned (1-Trial, n = 16; 6-Trial, n = 20; 10-Trial, n = 19; all fear-conditioned/FC'ed), and all rats. MPF – mean peak frequency; categories of USV: 50-kHz (MPF >32 kHz), short 22-kHz (MPF of 18–32 kHz, duration <0.3 s), long 22-kHz (18–32 kHz, >0.3 s); significance levels are given for corresponding 50- vs. 22-kHz sounds, i.e. # p < 0.05, ## p < 0.01, ### p < 0.001, all Wilcoxon test. Please note, duration and MPF of 50-kHz USV were compared only in rats which emitted USV in response to both 50- and 22-kHz playback, n of animals are given. A single USV was eliminated as a long outlier (with > 6 x SD). USV emitted in reaction to 22-kHz playbacks were less numerous, shorter and of lower MPF.

| groups                                                              | number of USV |              |                  |                 | parameters of 50-kHz USV |    |             |
|---------------------------------------------------------------------|---------------|--------------|------------------|-----------------|--------------------------|----|-------------|
| USV                                                                 | total USV     | 50-kHz USV   | short 22-kHz USV | long 22-kHz USV | duration [ms]            | n  | MPF [kHz]   |
| <b>USV emitted to 50-kHz USV-playback (0–120 s time-intervals)</b>  |               |              |                  |                 |                          |    |             |
| 0-Trial                                                             | 41.2 ± 7.1    | 39.9 ± 6.9   | 0.9 ± 0.2        | 0.3 ± 0.3       | 26.6 ± 1.6               | 30 | 60.6 ± 1.6  |
| 1-Trial                                                             | 59.1 ± 19.5   | 57.8 ± 19.3  | 1.3 ± 0.6        | 0.0 ± 0.0       | 24.8 ± 2.2               | 15 | 60.4 ± 1.1  |
| 6-Trial                                                             | 86.4 ± 16.5   | 85.7 ± 16.5  | 0.8 ± 0.3        | 0.0 ± 0.0       | 29.5 ± 2.4               | 15 | 61.2 ± 0.6  |
| 10-Trial                                                            | 97.5 ± 17.5   | 95.8 ± 17.2  | 1.7 ± 0.7        | 0.0 ± 0.0       | 30.6 ± 1.8               | 19 | 60.9 ± 0.7  |
| all FC'ed                                                           | 82.3 ± 10.3   | 81.0 ± 10.2  | 1.2 ± 0.3        | 0.0 ± 0.0       | 28.5 ± 1.2               | 49 | 60.8 ± 0.5  |
| all rats                                                            | 65.7 ± 7.1    | 64.5 ± 7.0   | 1.1 ± 0.2        | 0.1 ± 0.1       | 27.8 ± 1.0               | 79 | 60.7 ± 0.7  |
| <b>USV emitted to 50-kHz tone-playback (0–120 s time-intervals)</b> |               |              |                  |                 |                          |    |             |
| 0-Trial                                                             | 41.4 ± 6.6    | 40.4 ± 6.5   | 1.0 ± 0.4        | 0.0 ± 0.0       | 27.5 ± 1.4               |    | 58.8 ± 0.8* |
| 1-Trial                                                             | 49.3 ± 16.2   | 48.6 ± 16.1  | 0.8 ± 0.2        | 0.0 ± 0.0       | 25.4 ± 2.2               |    | 60.6 ± 1.4  |
| 6-Trial                                                             | 76.0 ± 18.5   | 74.6 ± 18.4  | 1.4 ± 0.5        | 0.0 ± 0.0       | 30.1 ± 2.9               |    | 60.1 ± 1.1  |
| 10-Trial                                                            | 76.3 ± 15.3   | 75.4 ± 15.2  | 0.9 ± 0.4        | 0.0 ± 0.0       | 31.7 ± 2.2               |    | 60.6 ± 0.6  |
| all FC'ed                                                           | 68.3 ± 9.7*   | 67.3 ± 9.7*  | 1.0 ± 0.2        | 0.0 ± 0.0       | 29.3 ± 1.4               |    | 60.5 ± 0.6  |
| all rats                                                            | 57.5 ± 6.5    | 56.5 ± 6.5   | 1.0 ± 0.2        | 0.0 ± 0.0       | 28.6 ± 1.0               |    | 59.8 ± 0.5* |
| <b>USV emitted to 22-kHz USV-playback (0–120 s time-intervals)</b>  |               |              |                  |                 |                          |    |             |
| 0-Trial                                                             | 13.5 ± 3.6    | 12.9 ± 3.6   | 0.6 ± 0.3        | 0.0 ± 0.0       | 23.5 ± 2.2               | 16 | 56.9 ± 1.9  |
| 1-Trial                                                             | 14.6 ± 5.4    | 13.4 ± 5.3   | 1.1 ± 0.6        | 0.0 ± 0.0       | 18.8 ± 3.1               | 8  | 57.5 ± 2.2  |
| 6-Trial                                                             | 32.2 ± 7.6    | 31.9 ± 7.6   | 0.3 ± 0.1        | 0.0 ± 0.0       | 31.6 ± 2.7               | 11 | 60.1 ± 0.7  |
| 10-Trial                                                            | 30.9 ± 9.8    | 29.9 ± 9.8   | 1.1 ± 0.5        | 0.0 ± 0.0       | 25.7 ± 2.4               | 12 | 61.0 ± 0.6  |
| all FC'ed                                                           | 26.6 ± 4.7    | 25.8 ± 4.7   | 0.8 ± 0.3        | 0.0 ± 0.0       | 26.0 ± 1.7               | 31 | 59.8 ± 0.7  |
| all rats                                                            | 21.4 ± 3.2    | 20.6 ± 3.2   | 0.7 ± 0.2        | 0.0 ± 0.0       | 25.2 ± 1.4               | 47 | 58.8 ± 0.8  |
| <b>USV emitted to 22-kHz tone-playback (0–120 s time-intervals)</b> |               |              |                  |                 |                          |    |             |
| 0-Trial                                                             | 6.6 ± 2.1**   | 6.1 ± 2.0**  | 0.5 ± 0.3        | 0.0 ± 0.0       | 19.3 ± 2.2               |    | 54.0 ± 2.1* |
| 1-Trial                                                             | 16.0 ± 6.9    | 15.3 ± 6.9   | 0.7 ± 0.5        | 0.0 ± 0.0       | 19.7 ± 3.7               |    | 58.3 ± 1.8  |
| 6-Trial                                                             | 18.1 ± 5.5    | 17.8 ± 5.5*  | 0.4 ± 0.2        | 0.0 ± 0.0       | 28.7 ± 3.0               |    | 59.4 ± 0.6  |
| 10-Trial                                                            | 23.3 ± 8.1    | 23.2 ± 8.1   | 0.1 ± 0.1        | 0.0 ± 0.0       | 26.3 ± 2.0               |    | 57.9 ± 1.5  |
| all FC'ed                                                           | 19.3 ± 3.9    | 18.9 ± 3.9   | 0.4 ± 0.2        | 0.0 ± 0.0       | 25.4 ± 1.7               |    | 58.5 ± 0.8  |
| all rats                                                            | 14.2 ± 2.6**  | 13.8 ± 2.6** | 0.4 ± 0.1        | 0.0 ± 0.0       | 23.3 ± 1.4               |    | 57.0 ± 0.9  |

**Table S13.** Comparison of **number of USV of different types** and **selected characteristics of 50-kHz USV** emitted during playback sessions, i.e. during the 10-s-long playback and 110 s afterwards, **in response to USV- vs. tone-playback** in control (0-Trial, n = 37), fear-conditioned (1-Trial, n = 16; 6-Trial, n = 20; 10-Trial, n = 19; all fear-conditioned, all FC'ed), and all rats. MPF – mean peak frequency; three categories of USV are: 50-kHz USV (MPF >32 kHz), short 22-kHz (MPF of 18–32 kHz, duration <0.3 s), long 22-kHz (MPF of 18–32 kHz, duration >0.3 s); significance levels are given for corresponding USV- vs. tone-playbacks, i.e. \* p < 0.05, \*\* p < 0.01, all Wilcoxon test. Please note, the duration and MPF of 50-kHz USV were compared only in rats which emitted USV in response to both USV- and tone-playback, and relevant n of animals are given. USV emitted in reaction to tone playbacks turned out to be less numerous and of lower MPF.

| Differences in time spent in speaker's half following USV- vs. tone-playbacks |                              |               |         |               |               |                               |         |         |               |               |
|-------------------------------------------------------------------------------|------------------------------|---------------|---------|---------------|---------------|-------------------------------|---------|---------|---------------|---------------|
| group:                                                                        | 0-Trial                      | 1-Trial       | 6-Trial | 10-Trial      | all rats      | 0-Trial                       | 1-Trial | 6-Trial | 10-Trial      | all rats      |
| # of rats                                                                     | n = 37                       | n = 16        | n = 20  | n = 19        | n = 92        | n = 37                        | n = 16  | n = 20  | n = 19        | n = 92        |
| time-interval [s]                                                             | 50-kHz playback; USV vs tone |               |         |               |               | 22-kHz playback; USV vs. tone |         |         |               |               |
| 0 s (playback)                                                                | 0.7275                       | 0.5936        | 0.0949  | 0.4631        | 0.9258        | 0.9757                        | 0.0926  | 0.7782  | 0.9250        | 0.4763        |
| 10 s to 30 s                                                                  | 0.1005                       | 0.1386        | 0.2787  | <b>0.0342</b> | <b>0.0020</b> | 0.2418                        | 0.1141  | 0.3343  | 0.0528        | 0.1779        |
| 10 s to 60 s                                                                  | 0.0670                       | <b>0.0231</b> | 0.1701  | 0.0627        | <b>0.0004</b> | 0.1215                        | 0.6949  | 0.1701  | 0.0692        | <b>0.0236</b> |
| -120 s to -100 s                                                              | 0.3505                       | 0.4900        | 0.0555  | 0.6791        | 0.7790        | 0.7704                        | 0.2721  | 0.4777  | <b>.0309*</b> | 0.8076        |
| -30 s to -10 s                                                                | 0.2329                       | 0.1730        | 0.1981  | 0.8971        | 0.0593        | 0.8824                        | 0.6566  | 0.7939  | 0.6496        | 0.8710        |

**Table S14. Differences in time spent** in the speaker's half in response to USV- vs. tone-playbacks evaluated during playback (0 s time-interval), after playback (10 s to 30 s, 10 s to 60 s), as well as during the control intervals (from -120 s to -100 s, -30 s to -10 s), in control rats (0-Trial), and rats which underwent fear-conditioning with different number of shocks (1-Trial, 6-Trial, 10-Trial) as well as all the rats analyzed together, all Wilcoxon test, with  $p < 0.05$  values in bold. Please note, USV-playback evoked more pronounced approach of the speaker, e.g. in "all rats" group; \* – not significant when two outlying rats were included.
